# Supplementary material for: Maresin 1 promotes nerve regeneration and alleviates neuropathic pain after nerve injury
Source: Springer Nature journal article supplement (doi:10.1186/s12974-022-02405-1), 2022-02-02
Supplement: MOESM3 [file 20093484]

**Table 1 Statistical report**

|                  | TEST USED                            | Animal         |                                 | DESCRIPTIVE STATS<br>(AVERAGE, VARIANCE)                                                                              |                                                                                                                      | P VALUE     | DEGREE OF FREEDOM &<br>F/t/z/R/ETC VALUE | E value |
|------------------|--------------------------------------|----------------|---------------------------------|-----------------------------------------------------------------------------------------------------------------------|----------------------------------------------------------------------------------------------------------------------|-------------|------------------------------------------|---------|
| FIGURE<br>NUMBER | WHICH TEST?                          | EXACT<br>VALUE | DEFINED?                        | Mean                                                                                                                  | SD                                                                                                                   | EXACT VALUE | VALUE                                    | E value |
| Fig.1A           | One-way ANOVA<br>Bonferroni post hoc | 8              | Adult male mice<br>(8-10 weeks) | -24.68125<br>-33.66875<br>-30.32<br>-28.975<br>-35.18375<br>-34.73875<br>-30.2475<br>-22.64375                        | 20.6424<br>31.76186<br>27.4817<br>31.49203<br>27.6097<br>34.97856<br>26.89575<br>20.3996                             | P<0.0001    | F (7, 56) = 104.9                        | 14      |
| Fig. 1B          | One-way ANOVA<br>Bonferroni post hoc | 8              | Adult male mice<br>(8-10 weeks) | 300<br>20.25<br>39.25<br>41.63<br>45.38<br>53.13<br>60<br>64.25<br>70.25<br>66.88<br>74.13<br>78.25<br>80.13<br>89.38 | 0<br>11.88<br>22.86<br>20.6<br>16.67<br>15.93<br>14.86<br>12.06<br>9.633<br>11.84<br>10.03<br>10.9<br>9.891<br>9.561 | P<0.0001    | F (13, 98) = 190.1                       | 14      |

|        |                                      |   |                                 |                                                                                                                                  |                                                                                                                                                    |          |                    |    |
|--------|--------------------------------------|---|---------------------------------|----------------------------------------------------------------------------------------------------------------------------------|----------------------------------------------------------------------------------------------------------------------------------------------------|----------|--------------------|----|
| Fig.1C | One-way ANOVA<br>Bonferroni post hoc | 8 | Adult male mice<br>(8-10 weeks) | 0.99<br>3.878<br>1.663<br>0.5138<br>0.05<br>0.04125<br>0.1075<br>0.1238<br>0.1063<br>0.1388<br>0.14<br>0.175<br>0.2263<br>0.2463 | 0.2286<br>0.8536<br>0.3682<br>0.1608<br>0.03817<br>0.03227<br>0.06541<br>0.02774<br>0.06413<br>0.06081<br>0.05855<br>0.09165<br>0.09782<br>0.09273 | P<0.0001 | F (13, 98) = 124.1 | 14 |
| Fig.1D | One-way ANOVA<br>Bonferroni post hoc | 8 | Adult male mice<br>(8-10 weeks) | 10.66<br>17.47<br>10.53<br>7.73<br>5.444<br>4.705<br>6.23<br>5.285<br>6.436<br>6.221<br>7.228<br>8.343<br>9.19<br>10.18          | 0.5838<br>1.581<br>1.349<br>0.8462<br>0.6968<br>0.9036<br>0.8362<br>1.362<br>0.7654<br>0.9818<br>1.345<br>1.041<br>0.6317<br>0.7216                | P<0.0001 | F (13, 98) = 84.14 | 14 |

|        |                                      |         |                                 |                                                                                                                                                                                                                                                                    |                                                                                                                                                                                                                                                                               |          |                      |    |
|--------|--------------------------------------|---------|---------------------------------|--------------------------------------------------------------------------------------------------------------------------------------------------------------------------------------------------------------------------------------------------------------------|-------------------------------------------------------------------------------------------------------------------------------------------------------------------------------------------------------------------------------------------------------------------------------|----------|----------------------|----|
| Fig.2A | One-way ANOVA<br>Bonferroni post hoc | 6,6,6,6 | Adult male mice<br>(8-10 weeks) | Naïve<br>-7.5<br>-7.966667<br>-7.916667<br>-7.9<br>-8<br>Sham<br>-7.5<br>-7.983334<br>-7.95<br>-7.816667<br>-8.05<br>sham+vehicle<br>-7.5<br>-8.016666<br>-8.05<br>-7.883333<br>-7.866667<br>sham+MaR1<br>-7.5<br>-7.816667<br>-7.933333<br>-7.883333<br>-7.933333 | Naïve<br>0<br>0.2581988<br>0.3125168<br>0.1673322<br>0.3033149<br>Sham<br>0<br>0.2041243<br>0.3449639<br>0.2639445<br>0.3146426<br>sham+vehicle<br>0<br>0.3488075<br>0.2880971<br>0.3710345<br>0.3011091<br>sham+MaR1<br>0<br>0.2639444<br>0.2943921<br>0.2483277<br>0.350238 | P=0.9757 | F (12, 100) = 0.3548 | 20 |
|--------|--------------------------------------|---------|---------------------------------|--------------------------------------------------------------------------------------------------------------------------------------------------------------------------------------------------------------------------------------------------------------------|-------------------------------------------------------------------------------------------------------------------------------------------------------------------------------------------------------------------------------------------------------------------------------|----------|----------------------|----|

|        |                                      |         |                                 |                                                                                                                                                                                                                                                                  |                                                                                                                                                                                                                                                                                       |          |                      |    |
|--------|--------------------------------------|---------|---------------------------------|------------------------------------------------------------------------------------------------------------------------------------------------------------------------------------------------------------------------------------------------------------------|---------------------------------------------------------------------------------------------------------------------------------------------------------------------------------------------------------------------------------------------------------------------------------------|----------|----------------------|----|
| Fig.2B | One-way ANOVA<br>Bonferroni post hoc | 6,6,6,6 | Adult male mice<br>(8-10 weeks) | Na ïve<br>300.5<br>300.5<br>302<br>303.5<br>300.8333<br>Sham<br>300.3333<br>300.5<br>302.8333<br>301.8333<br>301.6667<br>sham+vehicle<br>300.6667<br>301.3333<br>302<br>303<br>302.1667<br>sham+MaR1<br>300.8333<br>301.3333<br>302.8333<br>301.6667<br>299.6667 | Na ïve<br>3.271086<br>1.643168<br>1.67332<br>2.428992<br>3.188521<br>Sham<br>2.160247<br>0.83666<br>0.7527726<br>2.483277<br>2.42212<br>sham+vehicle<br>2.33809<br>1.75119<br>1.67332<br>1.788854<br>1.47196<br>sham+MaR1<br>2.041241<br>1.032796<br>1.169045<br>2.581989<br>1.861899 | P=0.6554 | F (12, 100) = 0.7942 | 20 |
|--------|--------------------------------------|---------|---------------------------------|------------------------------------------------------------------------------------------------------------------------------------------------------------------------------------------------------------------------------------------------------------------|---------------------------------------------------------------------------------------------------------------------------------------------------------------------------------------------------------------------------------------------------------------------------------------|----------|----------------------|----|

|        |                                      |         |                                 |                                                                                                                                                                                                                                                                               |                                                                                                                                                                                                                                                                                                                   |          |                      |    |
|--------|--------------------------------------|---------|---------------------------------|-------------------------------------------------------------------------------------------------------------------------------------------------------------------------------------------------------------------------------------------------------------------------------|-------------------------------------------------------------------------------------------------------------------------------------------------------------------------------------------------------------------------------------------------------------------------------------------------------------------|----------|----------------------|----|
| Fig.2C | One-way ANOVA<br>Bonferroni post hoc | 6,6,6,6 | Adult male mice<br>(8-10 weeks) | Naïve<br>0.9933333<br>1.025<br>1.055<br>1.108333<br>1.01<br>Sham<br>0.9933333<br>0.9566666<br>1.063333<br>1.016667<br>1.1<br>sham+vehicle<br>0.9933333<br>0.9716666<br>1.031667<br>1.04<br>0.9866667<br>sham+MaR1<br>0.9933333<br>0.9866667<br>0.9866667<br>1.055<br>1.016667 | Naïve<br>0.2703824<br>0.1873766<br>0.1930544<br>0.2115104<br>0.07348467<br>Sham<br>0.2703824<br>0.2024516<br>0.1364795<br>0.2301883<br>0.09295157<br>sham+vehicle<br>0.2703824<br>0.2694748<br>0.1637579<br>0.09295157<br>0.2192411<br>sham+MaR1<br>0.2703824<br>0.2192411<br>0.2192411<br>0.1930544<br>0.2301883 | P=0.9994 | F (12, 100) = 0.1620 | 20 |
|--------|--------------------------------------|---------|---------------------------------|-------------------------------------------------------------------------------------------------------------------------------------------------------------------------------------------------------------------------------------------------------------------------------|-------------------------------------------------------------------------------------------------------------------------------------------------------------------------------------------------------------------------------------------------------------------------------------------------------------------|----------|----------------------|----|

|        |                                       |               |                                 |                                                                                                                                                                                                                                                                            |                                                                                                                                                                                                                                                                                                                |          |                      |    |
|--------|---------------------------------------|---------------|---------------------------------|----------------------------------------------------------------------------------------------------------------------------------------------------------------------------------------------------------------------------------------------------------------------------|----------------------------------------------------------------------------------------------------------------------------------------------------------------------------------------------------------------------------------------------------------------------------------------------------------------|----------|----------------------|----|
| Fig.2D | One-way ANOVA,<br>Bonferroni post hoc | 6,6,6,6       | Adult male mice<br>(8-10 weeks) | Na ïve<br>10.14833<br>9.991667<br>9.993334<br>10.38833<br>10.25833<br>Sham<br>10.45<br>10.17833<br>10.26<br>10.11667<br>10.05<br>sham+vehicle<br>10.375<br>10.36<br>10.40833<br>10.25167<br>10.32167<br>sham+MaR1<br>10.63167<br>10.48667<br>10.38<br>10.28667<br>10.04833 | Na ïve<br>0.5438903<br>0.3969592<br>0.1901229<br>0.4056315<br>0.6670957<br>Sham<br>0.4258168<br>0.1720949<br>0.4353848<br>0.1351543<br>0.2068819<br>sham+vehicle<br>0.6155241<br>0.5092348<br>0.4234817<br>0.310639<br>0.4649481<br>sham+MaR1<br>0.4752859<br>0.3771827<br>0.3896667<br>0.2922101<br>0.4534055 | P=0.5661 | F (12, 100) = 0.8834 | 20 |
| Fig.3C | One-way ANOVA<br>Bonferroni post hoc  | 3,3,3,3,3,3,3 | mouse DRG neuron                | 240.2<br>281.1<br>372.6<br>509.5<br>701.4<br>843.1<br>861.4                                                                                                                                                                                                                | 35.38<br>60.73<br>88.57<br>53.76<br>86.43<br>92.12<br>43.51                                                                                                                                                                                                                                                    | P<0.0001 | F (6, 14) = 42.50    | 14 |

|        |                                      |             |                  |                                                             |                                                                     |                      |                                  |    |
|--------|--------------------------------------|-------------|------------------|-------------------------------------------------------------|---------------------------------------------------------------------|----------------------|----------------------------------|----|
| Fig.3D | One-way ANOVA<br>Bonferroni post hoc | 3,3,3,3,3,3 | mouse DRG neuron | 1.639<br>1.642<br>1.885<br>2.094<br>2.338<br>2.538<br>2.543 | 0.1035<br>0.1179<br>0.1102<br>0.1041<br>0.1652<br>0.1484<br>0.07485 | P<0.0001             | F (6, 14) = 31.19                | 14 |
| Fig.3G | Unpaired T test                      | 3,3         | mouse DRG neuron | 240.2<br>843.1<br>534.6<br>861.4<br>851.5                   | 35.38<br>92.12<br>75.97<br>43.51<br>37.78                           | P=0.0110<br>P=0.7793 | t=4.476, df=4<br>t=0.2998, df=4  |    |
| Fig.3G | One-way ANOVA<br>Bonferroni post hoc | 3,3,3,3,3   | mouse DRG neuron | 240.2<br>843.1<br>534.6<br>861.4<br>851.5                   | 35.38<br>92.12<br>75.97<br>43.51<br>37.78                           | P<0.0001             | F (4, 10) = 60.26                | 10 |
| Fig.3H | Unpaired T test                      | 3,3         | mouse DRG neuron | 1.639<br>2.538<br>2.321<br>2.543<br>2.535                   | 0.1035<br>0.1484<br>0.1604<br>0.1749<br>0.1777                      | P=0.1594<br>P=0.9566 | t=1.726, df=4<br>t=0.05790, df=4 |    |

|        |                                      |           |                      |                                           |                                                |          |                   |    |
|--------|--------------------------------------|-----------|----------------------|-------------------------------------------|------------------------------------------------|----------|-------------------|----|
| Fig.3H | One-way ANOVA<br>Bonferroni post hoc | 3,3,3,3,3 | mouse DRG neuron     | 1.639<br>2.538<br>2.321<br>2.543<br>2.535 | 0.1035<br>0.1484<br>0.1604<br>0.1749<br>0.1777 | P=0.0001 | F (4, 10) = 18.89 | 10 |
| Fig.4B | One-way ANOVA<br>Bonferroni post hoc | 12,12,12  | Dorsal root ganglion | 0<br>53.58<br>81.75                       | 0<br>12.7<br>10.43                             | P<0.0001 | F (2, 33) = 229.9 | 33 |
| Fig.4D | One-way ANOVA<br>Bonferroni post hoc | 12,12,12  | Dorsal root ganglion | 14.17<br>6.083<br>3.917                   | 2.823<br>2.392<br>1.881                        | P<0.0001 | F (2, 33) = 60.98 | 33 |
| Fig.4F | Unpaired T test                      | 6,7       | Muscle               | 53.65<br>67.85                            | 4.254<br>7.64                                  | P=0.0020 | t=4.032, df=11    |    |



|        |                                      |       |                                 |                                                                                                                                                                                                                                        |                                                                                                                                                                                                                          |          |                    |    |
|--------|--------------------------------------|-------|---------------------------------|----------------------------------------------------------------------------------------------------------------------------------------------------------------------------------------------------------------------------------------|--------------------------------------------------------------------------------------------------------------------------------------------------------------------------------------------------------------------------|----------|--------------------|----|
| Fig.4G | Two-way ANOVA<br>Bonferroni post hoc | 6,6,6 | Adult male mice<br>(8-10 weeks) | Vehicle<br>-7.5<br>-80.38834<br>-65.775<br>-45.66667<br>-22.38167<br>-11.81333<br>MaR1<br>-7.5<br>-62.415<br>-44.305<br>-17.77333<br>-8.941667<br>-8.263333<br>NGF<br>-7.5<br>-65.855<br>-49.57167<br>-20.11<br>-12.39167<br>-8.308333 | Vehicle<br>0<br>6.971757<br>3.738585<br>8.480453<br>6.806333<br>3.760216<br>MaR1<br>0<br>5.310008<br>8.861524<br>3.454317<br>1.673946<br>1.20427<br>NGF<br>0<br>5.599031<br>9.253683<br>4.658961<br>3.188394<br>1.309418 | P<0.0001 | F (10, 90) = 7.832 | 15 |
|--------|--------------------------------------|-------|---------------------------------|----------------------------------------------------------------------------------------------------------------------------------------------------------------------------------------------------------------------------------------|--------------------------------------------------------------------------------------------------------------------------------------------------------------------------------------------------------------------------|----------|--------------------|----|

|        |                                      |       |                                 |                                                                                                                                                                                                                                                                                                                                         |                                                                                                                                                                                                                                                                                                                                                                         |          |                     |    |
|--------|--------------------------------------|-------|---------------------------------|-----------------------------------------------------------------------------------------------------------------------------------------------------------------------------------------------------------------------------------------------------------------------------------------------------------------------------------------|-------------------------------------------------------------------------------------------------------------------------------------------------------------------------------------------------------------------------------------------------------------------------------------------------------------------------------------------------------------------------|----------|---------------------|----|
| Fig.4H | Two-way ANOVA<br>Bonferroni post hoc | 6,6,6 | Adult male mice<br>(8-10 weeks) | Vehicle<br>300<br>20.16667<br>46<br>47.83333<br>49.5<br>52.83333<br>55.33333<br>70<br>78.83334<br>75<br>MaR1<br>300<br>48.33333<br>67<br>81.33334<br>103.8333<br>122.3333<br>134.5<br>145.6667<br>159.5<br>178.1667<br>NGF<br>300<br>49.83333<br>57.83333<br>71.83334<br>82.66666<br>104.5<br>120.3333<br>121.6667<br>151.3333<br>166.5 | Vehicle<br>0<br>9.703951<br>22.56546<br>20.21303<br>17.24819<br>16.55798<br>12.53262<br>8.694826<br>9.174239<br>7.536578<br>MaR1<br>0<br>9.500877<br>10.8074<br>9.136009<br>14.07717<br>14.63785<br>16.71825<br>13.93796<br>10.91329<br>18.26928<br>NGF<br>0<br>9.907909<br>8.01041<br>9.703951<br>11.48332<br>19.42936<br>17.38582<br>15.39697<br>14.30618<br>18.76966 | P<0.0001 | F (18, 150) = 10.70 | 15 |
|--------|--------------------------------------|-------|---------------------------------|-----------------------------------------------------------------------------------------------------------------------------------------------------------------------------------------------------------------------------------------------------------------------------------------------------------------------------------------|-------------------------------------------------------------------------------------------------------------------------------------------------------------------------------------------------------------------------------------------------------------------------------------------------------------------------------------------------------------------------|----------|---------------------|----|

|        |                                      |       |                                 |                                                                                                                                                                                                                                                                                                                                                                  |                                                                                                                                                                                                                                                                                                                                                                                                                                        |          |                     |    |
|--------|--------------------------------------|-------|---------------------------------|------------------------------------------------------------------------------------------------------------------------------------------------------------------------------------------------------------------------------------------------------------------------------------------------------------------------------------------------------------------|----------------------------------------------------------------------------------------------------------------------------------------------------------------------------------------------------------------------------------------------------------------------------------------------------------------------------------------------------------------------------------------------------------------------------------------|----------|---------------------|----|
| Fig.4I | Two-way ANOVA<br>Bonferroni post hoc | 6,6,6 | Adult male mice<br>(8-10 weeks) | Vehicle<br>0.995<br>3.853333<br>1.696667<br>0.53<br>0.06<br>0.05666666<br>0.09666666<br>0.1016667<br>0.075<br>0.1316667<br>MaR1<br>0.9416667<br>3.388333<br>1.01<br>0.675<br>0.4816667<br>0.46<br>0.4966667<br>0.6566666<br>0.675<br>0.865<br>NGF<br>0.995<br>3.573333<br>0.9566666<br>0.53<br>0.2816667<br>0.2533333<br>0.1366667<br>0.12<br>0.115<br>0.2466667 | Vehicle<br>0.1754708<br>0.4265521<br>0.4291698<br>0.1479189<br>0.03521363<br>0.03444803<br>0.03204164<br>0.02228602<br>0.03209361<br>0.03488075<br>MaR1<br>0.09389712<br>0.4916267<br>0.2470627<br>0.1756986<br>0.1449713<br>0.1764086<br>0.1790717<br>0.2003663<br>0.1756986<br>0.1259762<br>NGF<br>0.1754708<br>0.6625004<br>0.2024516<br>0.1479189<br>0.1202359<br>0.1165619<br>0.0273252<br>0.03464102<br>0.04806246<br>0.07814517 | P<0.0001 | F (18, 100) = 6.945 | 15 |
|--------|--------------------------------------|-------|---------------------------------|------------------------------------------------------------------------------------------------------------------------------------------------------------------------------------------------------------------------------------------------------------------------------------------------------------------------------------------------------------------|----------------------------------------------------------------------------------------------------------------------------------------------------------------------------------------------------------------------------------------------------------------------------------------------------------------------------------------------------------------------------------------------------------------------------------------|----------|---------------------|----|

|        |                                      |       |                                 |                                                                                                                                                                                                                                                                                                                                                  |                                                                                                                                                                                                                                                                                                                                                                                                     |          |                     |    |
|--------|--------------------------------------|-------|---------------------------------|--------------------------------------------------------------------------------------------------------------------------------------------------------------------------------------------------------------------------------------------------------------------------------------------------------------------------------------------------|-----------------------------------------------------------------------------------------------------------------------------------------------------------------------------------------------------------------------------------------------------------------------------------------------------------------------------------------------------------------------------------------------------|----------|---------------------|----|
| Fig.4J | Two-way ANOVA<br>Bonferroni post hoc | 6,6,6 | Adult male mice<br>(8-10 weeks) | Vehicle<br>10.6<br>17.5<br>10.75<br>7.95<br>7.183333<br>4.966667<br>6.2<br>5.816667<br>6.35<br>6.2<br>MaR1<br>10.98333<br>15.85<br>8.316667<br>8.05<br>7.9<br>8.216667<br>8.966667<br>9.283333<br>9.183333<br>9.933333<br>NGF<br>10.38333<br>14.61667<br>7.866667<br>7.183333<br>5.966667<br>5.383333<br>5.883333<br>6.233334<br>6.8<br>7.216667 | Vehicle<br>0.5291505<br>1.508642<br>1.723659<br>1.569395<br>1.321237<br>1.39523<br>1.2<br>1.074089<br>0.8871301<br>0.8763561<br>MaR1<br>0.5776388<br>1.593424<br>1.361494<br>1.100455<br>1.126055<br>1.330288<br>1.013246<br>0.8612007<br>0.8158838<br>0.7447597<br>NGF<br>0.457894<br>1.769086<br>1.214358<br>1.160029<br>1.376469<br>1.077806<br>0.7547628<br>0.7089899<br>0.9859005<br>0.9907911 | P<0.0001 | F (18, 150) = 5.896 | 15 |
|--------|--------------------------------------|-------|---------------------------------|--------------------------------------------------------------------------------------------------------------------------------------------------------------------------------------------------------------------------------------------------------------------------------------------------------------------------------------------------|-----------------------------------------------------------------------------------------------------------------------------------------------------------------------------------------------------------------------------------------------------------------------------------------------------------------------------------------------------------------------------------------------------|----------|---------------------|----|

|        |                                      |       |                                 |                                                                                                                                                                                                              |                                                                                                                                                                                                                                                    |          |                   |    |
|--------|--------------------------------------|-------|---------------------------------|--------------------------------------------------------------------------------------------------------------------------------------------------------------------------------------------------------------|----------------------------------------------------------------------------------------------------------------------------------------------------------------------------------------------------------------------------------------------------|----------|-------------------|----|
| Fig.5A | Two-way ANOVA<br>Bonferroni post hoc | 6,6,6 | Adult male mice<br>(8-10 weeks) | Vehicle<br>1.048333<br>0.225<br>0.2283333<br>0.2366667<br>0.235<br>10 ng/ml MaR1<br>0.995<br>0.2216667<br>0.5116667<br>0.4083333<br>0.23<br>100 ng/ml MaR1<br>1.01<br>0.24<br>0.7516667<br>0.75<br>0.2483333 | Vehicle<br>0.2143284<br>0.05504543<br>0.06013872<br>0.1038589<br>0.04806245<br>10 ng/ml MaR1<br>0.1754708<br>0.09558591<br>0.157406<br>0.1734839<br>0.1100909<br>100 ng/ml MaR1<br>0.2470627<br>0.08717798<br>0.2183041<br>0.2641212<br>0.07808115 | P<0.0001 | F (8, 75) = 5.193 | 15 |
|--------|--------------------------------------|-------|---------------------------------|--------------------------------------------------------------------------------------------------------------------------------------------------------------------------------------------------------------|----------------------------------------------------------------------------------------------------------------------------------------------------------------------------------------------------------------------------------------------------|----------|-------------------|----|

|                        |                                      |       |                                 |                                                                                                                                                                                                   |                                                                                                                                                                                                                                      |          |                   |    |
|------------------------|--------------------------------------|-------|---------------------------------|---------------------------------------------------------------------------------------------------------------------------------------------------------------------------------------------------|--------------------------------------------------------------------------------------------------------------------------------------------------------------------------------------------------------------------------------------|----------|-------------------|----|
| Fig.5B                 | Two-way ANOVA<br>Bonferroni post hoc | 6,6,6 | Adult male mice<br>(8-10 weeks) | Vehicle<br>10.56667<br>4.866667<br>4.85<br>5.1<br>5.016666<br>10 ng/ml MaR1<br>10.68333<br>4.9<br>6.883333<br>6.466667<br>4.8<br>100 ng/ml MaR1<br>10.53333<br>5.116667<br>8.516666<br>8.2<br>4.9 | Vehicle<br>0.6918575<br>1.177568<br>1.127386<br>0.9777524<br>1.170328<br>10 ng/ml MaR1<br>0.9410987<br>0.9423376<br>1.228685<br>1.162182<br>0.6870226<br>100 ng/ml MaR1<br>0.6860515<br>0.9826835<br>1.307542<br>1.0583<br>0.8414273 | P<0.0001 | F (8, 75) = 5.018 | 15 |
| Fig.5C                 | Unpaired T test                      | 9,9   | mouse DRG neuron                | 266.1<br>57.12                                                                                                                                                                                    | 58.25<br>33.18                                                                                                                                                                                                                       | P<0.0001 | t=9.353, df=16    |    |
| Fig.5F GFAP            | Two-way ANOVA<br>Bonferroni post hoc | 4,4   | Spinal Dorsal horn              | Control<br>8.475<br>9.175<br>Ipsi<br>22.4<br>14.3                                                                                                                                                 | Control<br>2.707243<br>2.291106<br>Ipsi<br>5.303458<br>4.140048                                                                                                                                                                      | P=0.0138 | F (1, 3) = 27.13  | 12 |
| Fig.5F GFAP<br>vehicle | Unpaired T test                      | 4,4   | Spinal Dorsal horn              | 8.475<br>22.4                                                                                                                                                                                     | 2.707<br>5.303                                                                                                                                                                                                                       | P=0.0034 | t=4.677, df=6     |    |

|                                |                                      |     |                    |                                                    |                                                                   |          |                  |    |
|--------------------------------|--------------------------------------|-----|--------------------|----------------------------------------------------|-------------------------------------------------------------------|----------|------------------|----|
| Fig.5F GFAP<br>MaR1            | paired T test                        | 4,4 | Spinal Dorsal horn | 9.175<br>14.3                                      | 2.291<br>4.14                                                     | P=0.0201 | t=4.532, df=3    |    |
| Fig.5F IBA1                    | Two-way ANOVA<br>Bonferroni post hoc | 4,4 | Spinal Dorsal horn | Control<br>5.075<br>5.825<br>Ipsi<br>17.9<br>9.625 | Control<br>1.517399<br>1.560716<br>Ipsi<br>3.939543<br>1.951709   | P=0.0501 | F (1, 3) = 10.12 | 12 |
| Fig.5F IBA1<br>vehicle         | Unpaired T test                      | 4,5 | Spinal Dorsal horn | 5.075<br>17.9                                      | 1.517<br>3.94                                                     | P=0.0009 | t=6.076, df=6    |    |
| Fig.5F IBA1<br>MaR1            | Unpaired T test                      | 4,6 | Spinal Dorsal horn | 5.825<br>9.625                                     | 1.561<br>1.952                                                    | P=0.0228 | t=3.041, df=6    |    |
| Fig.5G IL-1 $\beta$            | Two-way ANOVA<br>Bonferroni post hoc | 4,4 | Spinal Dorsal horn | Control<br>1<br>1<br>Ipsi<br>18.35<br>8.3          | Control<br>0.2684523<br>0.2786874<br>Ipsi<br>3.711693<br>1.766352 | P=0.0366 | F (1, 3) = 12.99 | 12 |
| Fig.5G IL-1 $\beta$<br>vehicle | Unpaired T test                      | 4,4 | Spinal Dorsal horn | 1<br>18.35                                         | 0.2685<br>3.712                                                   | p<0.0001 | t=9.324, df=6    |    |
| Fig.5G IL-1 $\beta$<br>MaR1    | Unpaired T test                      | 4,4 | Spinal Dorsal horn | 1<br>8.3                                           | 0.2787<br>1.766                                                   | P=0.0002 | t=8.165, df=6    |    |

|                        |                                      |     |                    |                                              |                                                                   |          |                  |    |
|------------------------|--------------------------------------|-----|--------------------|----------------------------------------------|-------------------------------------------------------------------|----------|------------------|----|
| Fig.5G IL-6            | Two-way ANOVA<br>Bonferroni post hoc | 4,4 | Spinal Dorsal horn | Control<br>1<br>1<br>Ipsi<br>9.525<br>2.725  | Control<br>0.222411<br>0.2099206<br>Ipsi<br>1.652019<br>0.6751543 | P=0.0032 | F (1, 3) = 76.04 | 12 |
| Fig.5G IL-6<br>vehicle | Unpaired T test                      | 4,4 | Spinal Dorsal horn | 1<br>9.525                                   | 0.2224<br>1.652                                                   | P<0.0001 | t=10.23, df=6    |    |
| Fig.5G IL-6<br>MaR1    | Unpaired T test                      | 4,4 | Spinal Dorsal horn | 1<br>2.725                                   | 0.2099<br>0.6752                                                  | P=0.0028 | t=4.880, df=6    |    |
| Fig.5G TNF             | Two-way ANOVA<br>Bonferroni post hoc | 4,4 | Spinal Dorsal horn | Control<br>1<br>1<br>Ipsi<br>2.7875<br>1.385 | Control<br>0.3311596<br>0.284605<br>Ipsi<br>1.001977<br>0.53      | P=0.0626 | F (1, 3) = 8.400 | 12 |
| Fig.5G TNF<br>vehicle  | Unpaired T test                      | 4,4 | Spinal Dorsal horn | 1<br>2.788                                   | 0.3312<br>1.002                                                   | P=0.0147 | t=3.388, df=6    |    |
| Fig.5G TNF<br>MaR1     | Unpaired T test                      | 4,4 | Spinal Dorsal horn | 1<br>1.385                                   | 0.2846<br>0.53                                                    | P=0.2478 | t=1.280, df=6    |    |



|        |                                      |       |                                 |                                                                                                                                                                                                                                            |                                                                                                                                                                                                                                                                     |          |                    |    |
|--------|--------------------------------------|-------|---------------------------------|--------------------------------------------------------------------------------------------------------------------------------------------------------------------------------------------------------------------------------------------|---------------------------------------------------------------------------------------------------------------------------------------------------------------------------------------------------------------------------------------------------------------------|----------|--------------------|----|
| Fig.6A | Two-way ANOVA<br>Bonferroni post hoc | 6,6,6 | Adult male mice<br>(8-10 weeks) | Vehicle<br>0.9566666<br>0.7383333<br>0.81<br>0.9416667<br>0.9566666<br>0.995<br>MaR1<br>0.9416667<br>0.7716666<br>0.865<br>0.9416667<br>0.995<br>1.0333333<br>NGF<br>1.01<br>0.2566667<br>0.2883333<br>0.4083333<br>0.5116667<br>0.5583333 | Vehicle<br>0.2024516<br>0.1281276<br>0.1372589<br>0.09389712<br>0.2024516<br>0.1754708<br>MaR1<br>0.09389712<br>0.1096206<br>0.1259762<br>0.09389712<br>0.1754708<br>0.1306394<br>NGF<br>0.2470627<br>0.09244818<br>0.1252863<br>0.1633911<br>0.157406<br>0.1772475 | P<0.0001 | F (10, 90) = 4.676 | 15 |
|--------|--------------------------------------|-------|---------------------------------|--------------------------------------------------------------------------------------------------------------------------------------------------------------------------------------------------------------------------------------------|---------------------------------------------------------------------------------------------------------------------------------------------------------------------------------------------------------------------------------------------------------------------|----------|--------------------|----|

|            |                                      |       |                                 |                                                                                                                                                                                  |                                                                                                                                                                                                                      |                                                                      |                                                                                                      |    |
|------------|--------------------------------------|-------|---------------------------------|----------------------------------------------------------------------------------------------------------------------------------------------------------------------------------|----------------------------------------------------------------------------------------------------------------------------------------------------------------------------------------------------------------------|----------------------------------------------------------------------|------------------------------------------------------------------------------------------------------|----|
| Fig.6B     | Two-way ANOVA<br>Bonferroni post hoc | 6,6,6 | Adult male mice<br>(8-10 weeks) | Vehicle<br>10.33333<br>9.75<br>10.15<br>10.65<br>10.41667<br>MaR1<br>10.95<br>9.916667<br>10.3<br>11.18333<br>10.8<br>NGF<br>10.23333<br>6.333333<br>6.6<br>7.166667<br>7.783333 | Vehicle<br>1.04435<br>1.021273<br>0.8408331<br>0.5958188<br>0.6524312<br>MaR1<br>0.8264382<br>0.8565434<br>0.6260989<br>0.6047039<br>0.7874008<br>NGF<br>0.861781<br>1.298717<br>0.9715967<br>0.8617812<br>0.6645801 | P<0.0001                                                             | F (8, 75) = 5.416                                                                                    | 15 |
| Fig.6D AKT | One-way ANOVA<br>Bonferroni post hoc | 3,3,3 | ND7/23 cells                    | p-AKT/GAPDH<br>1<br>1.972<br>1.565                                                                                                                                               | p-AKT/GAPDH<br>0.3109<br>0.6122<br>0.2522                                                                                                                                                                            | P=0.0784<br>P=0.9111<br>P=0.0400                                     | F (2, 6) = 4.010<br>F (2, 6) = 0.09458<br>F (2, 6) = 5.772                                           |    |
| Fig.6D AKT | paired T test<br>Unpaired T test     | 3,3   | ND7/23 cells                    | AKT/GAPDH<br>1<br>1.025<br>0.9829<br>p-AKT/AKT<br>1<br>1.861<br>1.57                                                                                                             | AKT/GAPDH<br>0.1356<br>0.1524<br>0.03843<br>p-AKT/AKT<br>1<br>1.861<br>1.57                                                                                                                                          | P=0.0391<br>P=0.0354<br>P=0.8408<br>P=0.8443<br>P=0.0300<br>P=0.0489 | t=4.910, df=2<br>t=2.445, df=4<br>t=0.2144, df=4<br>t=0.2095, df=4<br>t=3.296, df=4<br>t=2.152, df=4 |    |

|             |                                      |       |              |                                                                           |                                                                                       |                                                                      |                                                                                                        |  |
|-------------|--------------------------------------|-------|--------------|---------------------------------------------------------------------------|---------------------------------------------------------------------------------------|----------------------------------------------------------------------|--------------------------------------------------------------------------------------------------------|--|
| Fig.6D ERK  | One-way ANOVA<br>Bonferroni post hoc | 3,3,3 | ND7/23 cells | p-ERK/GAPDH<br>1<br>1.153<br>3.115<br>ERK/GAPDH<br>1<br>0.7987<br>0.8331  | p-ERK/GAPDH<br>0.1653<br>0.2911<br>0.4435<br>ERK/GAPDH<br>0.4765<br>0.1648<br>0.1313  | P=0.0003<br>P=0.6965<br>P=0.0075                                     | F (2, 6) = 40.55<br>F (2, 6) = 0.3845<br>F (2, 6) = 12.33                                              |  |
| Fig.6D ERK  | Unpaired T test                      | 3,3   | ND7/23 cells | p-ERK/ERK<br>1<br>1.223<br>3.273                                          | p-ERK/ERK<br>0.4746<br>0.1107<br>0.953                                                | P=0.4731<br>P=0.0015<br>P=0.5273<br>P=0.5900<br>P=0.4733<br>P=0.0209 | t=0.7913, df=4<br>t=7.741, df=4<br>t=0.6916, df=4<br>t=0.5850, df=4<br>t=0.7908, df=4<br>t=3.697, df=4 |  |
| Fig.6F mTOR | One-way ANOVA<br>Bonferroni post hoc | 3,3,3 | ND7/23 cells | p-mTOR/GAPDH<br>1<br>2.067<br>1.297<br>mTOR/GAPDH<br>1<br>0.9743<br>1.088 | p-mTOR/GAPDH<br>0.8863<br>0.806<br>0.6194<br>mTOR/GAPDH<br>0.4299<br>0.3777<br>0.3092 | P=0.2962<br>P=0.9275<br>P=0.1381                                     | F (2, 6) = 1.501<br>F (2, 6) = 0.07625<br>F (2, 6) = 2.804                                             |  |
| Fig.6F mTOR | paired T test<br>Unpaired T test     | 3,3   | ND7/23 cells | p-mTOR/mTOR<br>1<br>2.255<br>1.21                                         | p-mTOR/mTOR<br>0.774<br>0.7614<br>0.5202                                              | P=0.0136<br>P=0.2047<br>P=0.9418<br>P=0.7867<br>P=0.0047<br>P=0.1963 | t=5.946, df=2<br>t=1.035, df=2<br>t=0.07773, df=4<br>t=0.2893, df=4<br>t=10.20, df=2<br>t=1.082, df=2  |  |

|                       |                                      |       |                  |                                                                         |                                                                                         |                                                                      |                                                                                                        |   |
|-----------------------|--------------------------------------|-------|------------------|-------------------------------------------------------------------------|-----------------------------------------------------------------------------------------|----------------------------------------------------------------------|--------------------------------------------------------------------------------------------------------|---|
| Fig.6F PI3K           | One-way ANOVA<br>Bonferroni post hoc | 3,3,3 | ND7/23 cells     | p-PI3K/GAPDH<br>1<br>1.877<br>1.236                                     | p-PI3K/GAPDH<br>0.176<br>0.5217<br>0.4909                                               | P=0.1029<br>P=0.9718<br>P=0.0186                                     | F (2, 6) = 3.402<br>F (2, 6) = 0.02872<br>F (2, 6) = 8.319                                             |   |
| Fig.6F PI3K           | paired T test<br>Unpaired T test     | 3,3   | ND7/23 cells     | PI3K/GAPDH<br>1<br>0.9868<br>1.009<br>p-PI3K/PI3K<br>1<br>1.89<br>1.206 | PI3K/GAPDH<br>0.08996<br>0.1027<br>0.1401<br>p-PI3K/PI3K<br>0.09104<br>0.3604<br>0.3111 | P=0.0483<br>P=0.3005<br>P=0.8754<br>P=0.9315<br>P=0.0143<br>P=0.3317 | t=4.382, df=2<br>t=0.6152, df=2<br>t=0.1671, df=4<br>t=0.09145, df=4<br>t=4.148, df=4<br>t=1.103, df=4 |   |
| Fig.6H<br>p-AKT/AKT   | One-way ANOVA<br>Bonferroni post hoc | 3,3,3 | mouse DRG neuron | 1<br>1.341<br>1.600                                                     | 0.2792<br>0.125<br>0.1249                                                               | p=0.0235                                                             | F (2, 6) = 7.476                                                                                       | 6 |
|                       | paired T test<br>Unpaired T test     | 3,3,3 | mouse DRG neuron |                                                                         |                                                                                         | p=0.3337<br>p=0.0273                                                 | t=1.932, df=4<br>t=3.400, df=4                                                                         |   |
| Fig.6H<br>p-mTOR/TOR  | One-way ANOVA<br>Bonferroni post hoc | 3,3,3 | mouse DRG neuron | 1<br>1.171<br>1.872                                                     | 0.3503<br>0.1094<br>0.2684                                                              | p=0.0145                                                             | F (2, 6) = 9.302                                                                                       | 6 |
|                       | paired T test<br>Unpaired T test     | 3,3,3 | mouse DRG neuron |                                                                         |                                                                                         | p=0.4646<br>p=0.0267                                                 | t=0.8076, df=4<br>t=3.424, df=4                                                                        |   |
| Fig.6H<br>p-PI3K/PI3K | One-way ANOVA<br>Bonferroni post hoc | 3,3,3 | mouse DRG neuron | 1<br>0.8478<br>2.383                                                    | 0.2845<br>0.1661<br>0.2425                                                              | p=0.0004                                                             | F (2, 6) = 38.49                                                                                       | 6 |
|                       | paired T test<br>Unpaired T test     | 3,3,3 | mouse DRG neuron |                                                                         |                                                                                         | p=0.4684<br>p=0.0030                                                 | t=0.8002, df=4<br>t=6.408, df=4                                                                        |   |

|                     |                                      |             |                  |                                                    |                                                          |                      |                                |    |
|---------------------|--------------------------------------|-------------|------------------|----------------------------------------------------|----------------------------------------------------------|----------------------|--------------------------------|----|
| Fig.6H<br>p-ERK/ERK | One-way ANOVA<br>Bonferroni post hoc | 3,3,3       | mouse DRG neuron | 1                                                  | 0.1318                                                   | p=0.0154             | F (2, 6) = 9.064               | 6  |
|                     | paired T test<br>Unpaired T test     | 3,3,3       | mouse DRG neuron | 1.499<br>1.148                                     | 0.1586<br>0.1502                                         | p=0.0138<br>p=0.2682 | t=4.188, df=4<br>t=1.285, df=4 |    |
| Fig. S2A            | One-way ANOVA<br>Bonferroni post hoc | 3,3,3,3,3,3 | mouse DRG neuron | 240.3<br>289.4<br>531.4<br>679.6<br>841.4<br>828.1 | 31.6<br>85.14<br>81.82<br>53.43<br>96.35<br>14.9         | P<0.0001             | F (5, 12) = 44.99              | 12 |
| Fig. S2B            | One-way ANOVA<br>Bonferroni post hoc | 3,3,3,3,3,3 | mouse DRG neuron | 1.639<br>1.827<br>2.303<br>2.518<br>2.515<br>2.503 | 0.1035<br>0.09296<br>0.2157<br>0.2245<br>0.114<br>0.1632 | P<0.0001             | F (5, 12) = 17.44              | 12 |
