# Supplementary material for: Maresin 1 promotes nerve regeneration and alleviates neuropathic pain after nerve injury
Source: Springer Nature journal article supplement (doi:10.1186/s12974-022-02405-1), 2022-02-02
Supplement: MOESM4 [file 20093484]

## Table 2 T test comparison

|    | <b>Figure</b>  |         | <b>Page</b> |
|----|----------------|---------|-------------|
| 3G | 10 ng/ml MaR1  | .....   | 1           |
| 3G | 10 ng/ml NGF   | .....   | 2           |
| 3G | 100 ng/ml MaR1 | .....   | 3           |
| 3G | 100 ng/ml NGF  | .....   | 4           |
| 3H | 10 ng/ml MaR1  | .....   | 5           |
| 3H | 10 ng/ml NGF   | .....   | 6           |
| 3H | 100 ng/ml MaR1 | .....   | 7           |
| 3H | 100 ng/ml NGF  | .....   | 8           |
| 6D | p-AKT/GAPDH    | Control | 9           |
| 6D | p-AKT/GAPDH    | MaR1    | 10          |
| 6D | p-AKT/GAPDH    | NGF     | 11          |
| 6D | AKT/GAPDH      | Control | 12          |
| 6D | AKT/GAPDH      | MaR1    | 13          |
| 6D | AKT/GAPDH      | NGF     | 14          |
| 6D | p-AKT/AKT      | Control | 15          |
| 6D | p-AKT/AKT      | MaR1    | 16          |
| 6D | p-AKT/AKT      | NGF     | 17          |
| 6D | p-ERK/GAPDH    | Control | 18          |
| 6D | p-ERK/GAPDH    | MaR1    | 19          |
| 6D | p-ERK/GAPDH    | NGF     | 20          |
| 6D | ERK/GAPDH      | Control | 21          |
| 6D | ERK/GAPDH      | MaR1    | 22          |
| 6D | ERK/GAPDH      | NGF     | 23          |
| 6D | p-ERK/ERK      | Control | 24          |
| 6D | p-ERK/ERK      | MaR1    | 25          |
| 6D | p-ERK/ERK      | NGF     | 26          |
| 6F | p-mTOR/GAPDH   | Control | 27          |
| 6F | p-mTOR/GAPDH   | MaR1    | 28          |
| 6F | p-mTOR/GAPDH   | NGF     | 29          |
| 6F | mTOR/GAPDH     | Control | 30          |
| 6F | mTOR/GAPDH     | MaR1    | 31          |
| 6F | mTOR/GAPDH     | NGF     | 32          |
| 6F | p-mTOR/mTOR    | Control | 33          |
| 6F | p-mTOR/mTOR    | MaR1    | 34          |
| 6F | p-mTOR/mTOR    | NGF     | 35          |
| 6F | p-PI3K/GAPDH   | Control | 36          |
| 6F | p-PI3K/GAPDH   | MaR1    | 37          |
| 6F | p-PI3K/GAPDH   | NGF     | 38          |
| 6F | PI3K/GAPDH     | Control | 39          |
| 6F | PI3K/GAPDH     | MaR1    | 40          |
| 6F | PI3K/GAPDH     | NGF     | 41          |
| 6F | p-PI3K/PI3K    | Control | 42          |
| 6F | p-PI3K/PI3K    | MaR1    | 43          |
| 6F | p-PI3K/PI3K    | NGF     | 44          |

Fig 3G

10 ng/ml Maresin 1  
process report

10 ng/ml Maresin 1  
Normal distribution

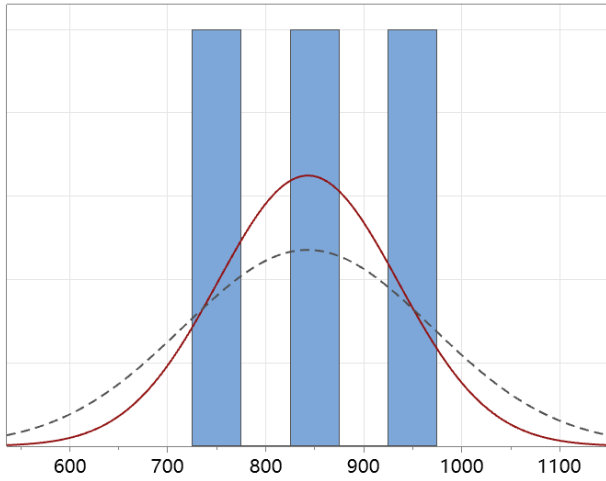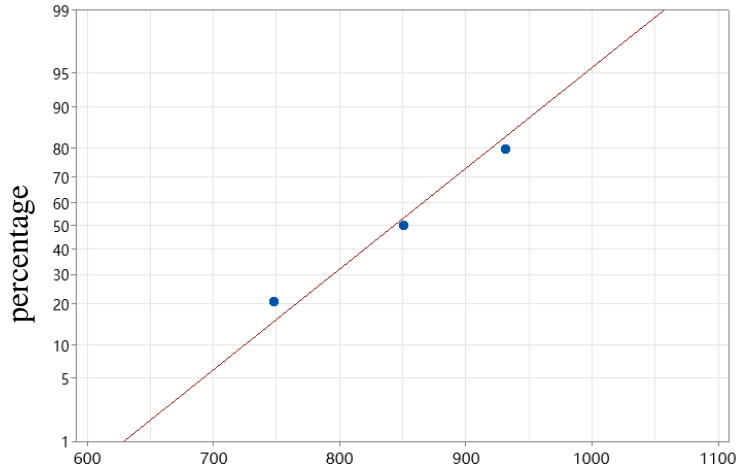

— Overall      - - - - - Within group

| Process data              |         |
|---------------------------|---------|
| Lower Specification Limit | 100     |
| Upper specification limit | 400     |
| Mean                      | 843.143 |
| N                         | 3       |
| SD (Overall)              | 92.1194 |
| SD (Within group)         | 127.061 |

| Overall |      |
|---------|------|
| Pp      | 0.54 |
| PPL     | 2.69 |
| PPU     | -1.6 |
| Ppk     | -1.6 |
| Cpm     | *    |

| Within group |       |
|--------------|-------|
| Cp           | 0.39  |
| CPL          | 1.95  |
| CPU          | -1.16 |
| Cpk          | -1.16 |

|         |       |
|---------|-------|
| Mean    | 84.31 |
| SD      | 92.12 |
| N       | 3     |
| AD      | 0.195 |
| P value | 0.606 |

Fig 3G

10 ng/ml NGF  
process report

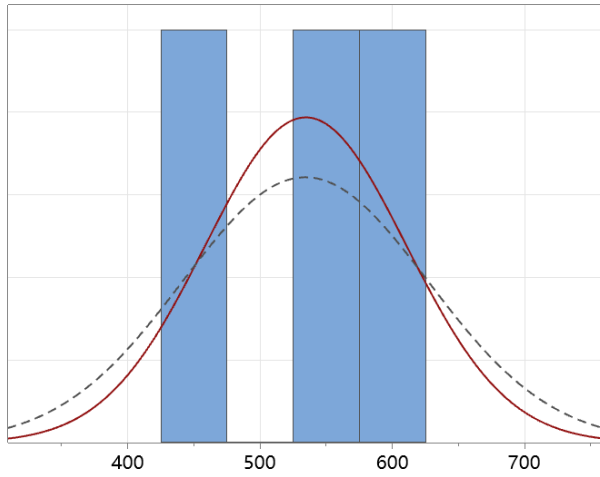

— Overall      - - - - - Within group

10 ng/ml NGF  
Normal distribution

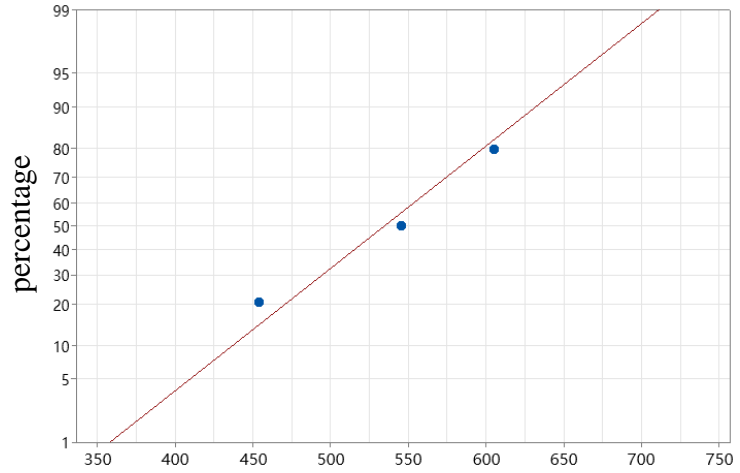

| Process data              |         |
|---------------------------|---------|
| Lower Specification Limit | 100     |
| Upper specification limit | 400     |
| Mean                      | 534.58  |
| N                         | 3       |
| SD (Overall)              | 75.9656 |
| SD (Within group)         | 93.0708 |

| Overall |       |
|---------|-------|
| Pp      | 0.66  |
| PPL     | 1.91  |
| PPU     | -0.59 |
| Ppk     | -0.59 |
| Cpm     | *     |

| Within group |       |
|--------------|-------|
| Cp           | 0.54  |
| CPL          | 1.56  |
| CPU          | -0.48 |
| Cpk          | -0.48 |

|         |       |
|---------|-------|
| Mean    | 534.6 |
| SD      | 75.97 |
| N       | 3     |
| AD      | 0.206 |
| P value | 0.557 |

Fig 3G

100 ng/ml Maresin 1  
process report

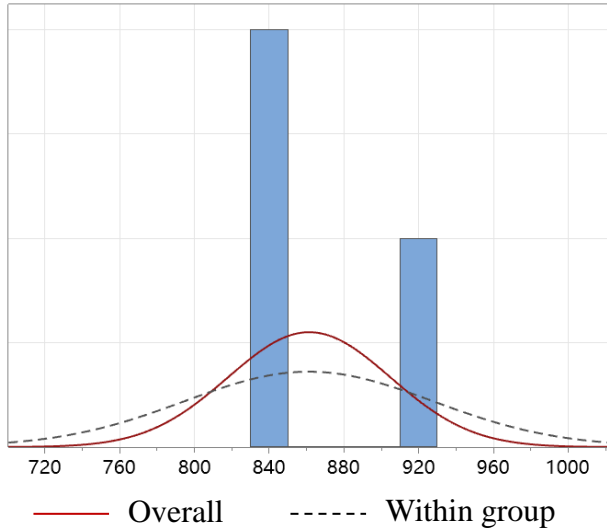

100 ng/ml Maresin 1  
Normal distribution

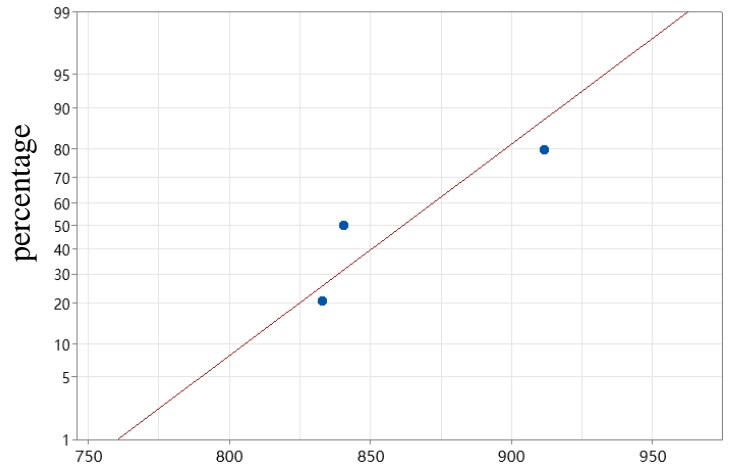

| Process data              |         |
|---------------------------|---------|
| Lower Specification Limit | 100     |
| Upper specification limit | 400     |
| Mean                      | 861.43  |
| N                         | 3       |
| SD (Overall)              | 43.5061 |
| SD (Within group)         | 66.5452 |

| Overall |       |
|---------|-------|
| Pp      | 1.15  |
| PPL     | 5.83  |
| PPU     | -3.54 |
| Ppk     | -3.54 |
| Cpm     | *     |

| Within group |       |
|--------------|-------|
| Cp           | 0.75  |
| CPL          | 3.81  |
| CPU          | -2.31 |
| Cpk          | -2.31 |

|         |       |
|---------|-------|
| Mean    | 861.4 |
| SD      | 43.51 |
| N       | 3     |
| AD      | 0.397 |
| P value | 0.12  |

Fig 3G

100 ng/ml NGF  
process report

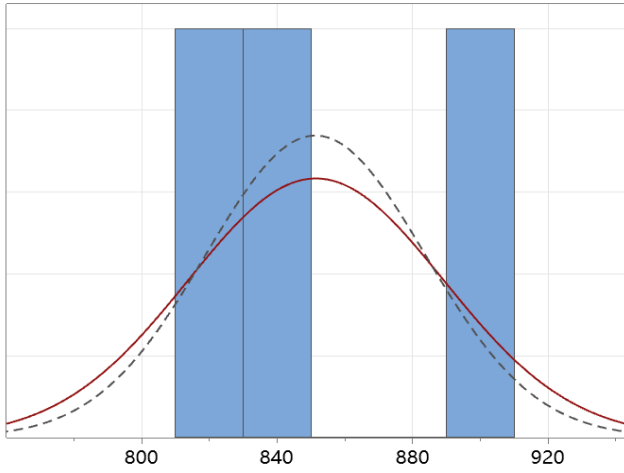

100 ng/ml NGF  
Normal distribution

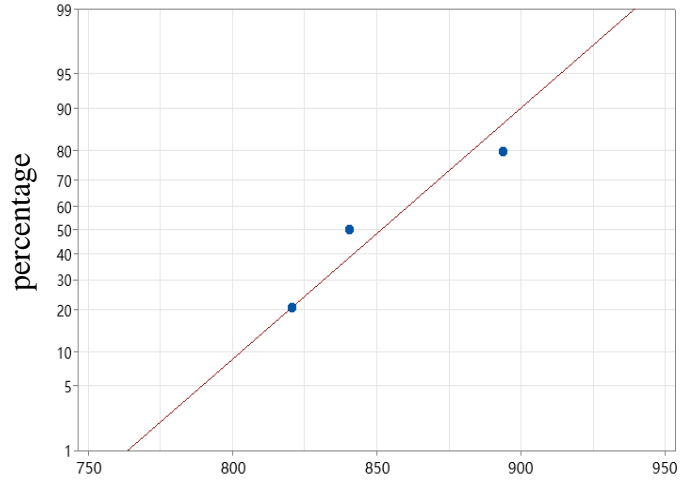

| Process data              |         |
|---------------------------|---------|
| Lower Specification Limit | 100     |
| Upper specification limit | 400     |
| Mean                      | 851.456 |
| N                         | 3       |
| SD (Overall)              | 37.7825 |
| SD (Within group)         | 32.3987 |

| Overall |       |
|---------|-------|
| Pp      | 1.32  |
| PPL     | 6.63  |
| PPU     | -3.98 |
| Ppk     | -3.98 |
| Cpm     | *     |

| Within group |       |
|--------------|-------|
| Cp           | 1.54  |
| CPL          | 7.73  |
| CPU          | -4.64 |
| Cpk          | -4.64 |

|         |       |
|---------|-------|
| Mean    | 851.5 |
| SD      | 37.78 |
| N       | 3     |
| AD      | 0.262 |
| P value | 0.375 |

Fig 3H

10 ng/ml Maresin 1  
process report

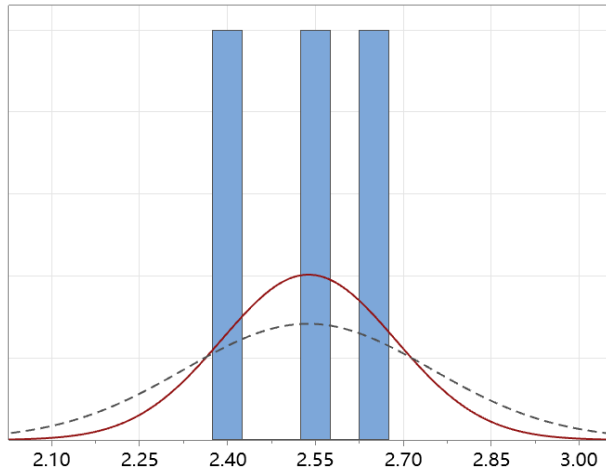

— Overall      - - - - - Within group

10 ng/ml Maresin 1  
Normal distribution

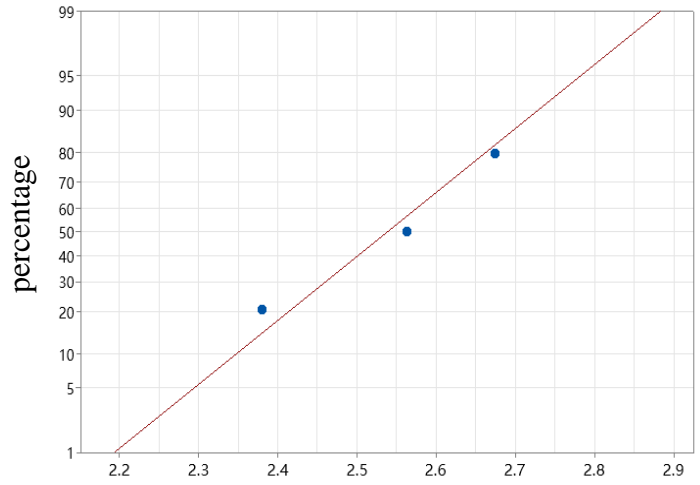

| Process data              |          |
|---------------------------|----------|
| Lower Specification Limit | 100      |
| Upper specification limit | 400      |
| Mean                      | 2.5384   |
| N                         | 3        |
| SD (Overall)              | 0.148412 |
| SD (Within group)         | 0.211569 |

| Overall |        |
|---------|--------|
| Pp      | 336.9  |
| PPL     | -218.9 |
| PPU     | 892.7  |
| Ppk     | -218.9 |
| Cpm     | *      |

| Within group |         |
|--------------|---------|
| Cp           | 236.33  |
| CPL          | -153.55 |
| CPU          | 626.21  |
| Cpk          | -153.55 |

|         |        |
|---------|--------|
| Mean    | 2.538  |
| SD      | 0.1484 |
| N       | 3      |
| AD      | 0.212  |
| P value | 0.536  |

Fig 3H

10 ng/ml NGF  
process report

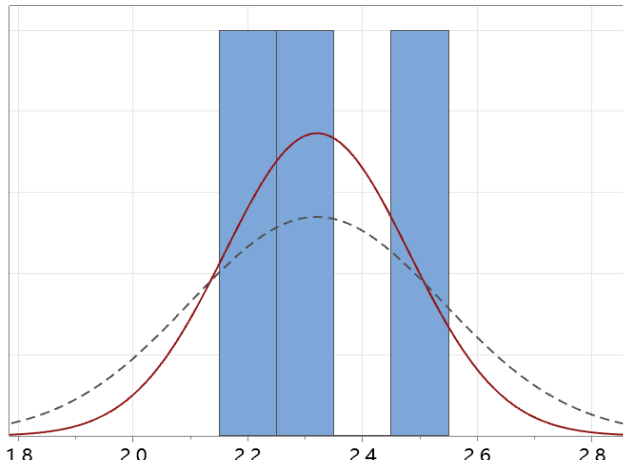

— Overall      - - - - - Within group

10 ng/ml NGF  
Normal distribution

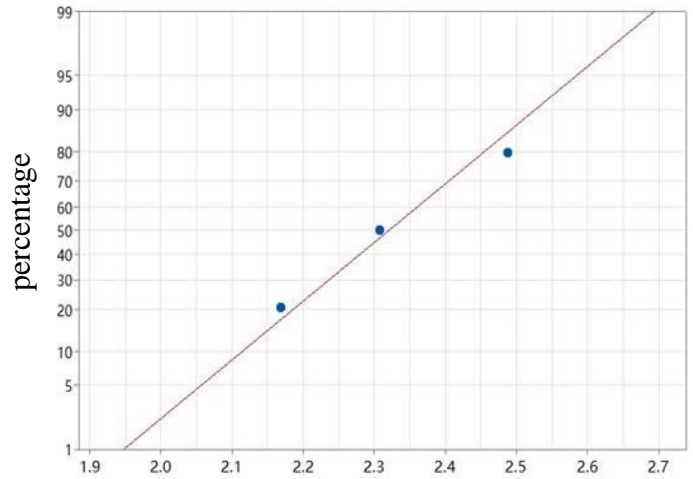

| Process data              |          |
|---------------------------|----------|
| Lower Specification Limit | 100      |
| Upper specification limit | 400      |
| Mean                      | 2.32057  |
| N                         | 3        |
| SD (Overall)              | 0.160424 |
| SD (Within group)         | 0.22172  |

| Overall |          |
|---------|----------|
| Pp      | 311.67   |
| PPL     | -2020.96 |
| PPU     | 826.31   |
| Ppk     | -202.96  |
| Cpm     | *        |

| Within group |         |
|--------------|---------|
| Cp           | 225.51  |
| CPL          | -146.85 |
| CPU          | 597.87  |
| Cpk          | -146.85 |

|         |        |
|---------|--------|
| Mean    | 2.321  |
| SD      | 0.1604 |
| N       | 3      |
| AD      | 0.195  |
| P value | 0.603  |

Fig 3H

100 ng/ml Maresin 1  
process report

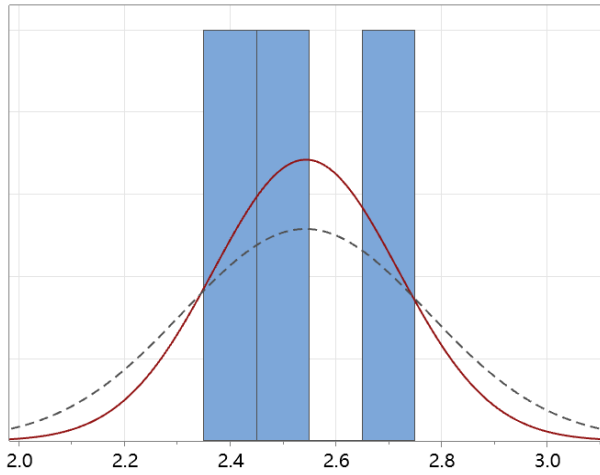

— Overall      - - - - - Within group

100 ng/ml Maresin 1  
Normal distribution

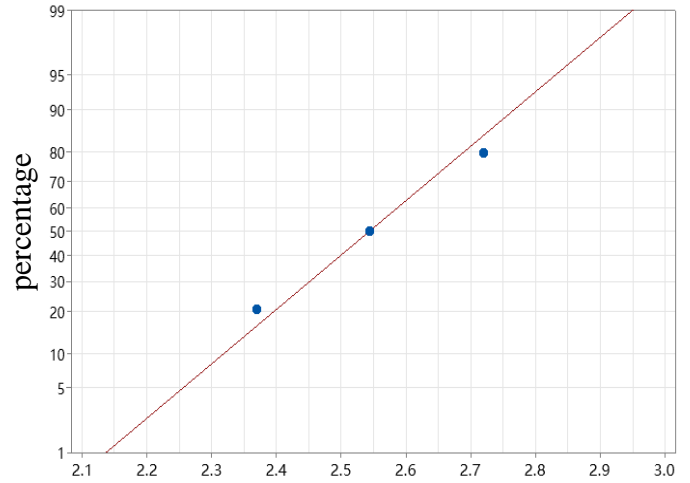

| Process data              |          |
|---------------------------|----------|
| Lower Specification Limit | 1        |
| Upper specification limit | 4        |
| Mean                      | 2.5433   |
| N                         | 3        |
| SD (Overall)              | 0.174851 |
| SD (Within group)         | 0.232048 |

| Overall |      |
|---------|------|
| Pp      | 2.86 |
| PPL     | 2.94 |
| PPU     | 2.78 |
| Ppk     | 2.78 |
| Cpm     | *    |

| Within group |      |
|--------------|------|
| Cp           | 2.15 |
| CPL          | 2.22 |
| CPU          | 2.09 |
| Cpk          | 2.09 |

|         |        |
|---------|--------|
| Mean    | 2.543  |
| SD      | 0.1749 |
| N       | 3      |
| AD      | 0.19   |
| P value | 0.631  |



Fig 3H

100 ng/ml NGF  
process report

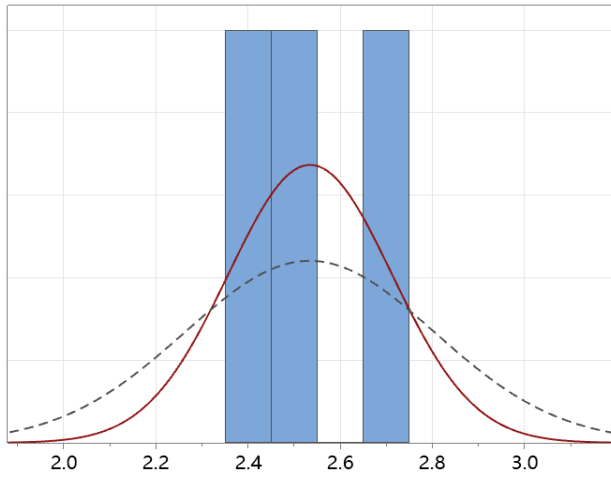

100 ng/ml NGF  
Normal distribution

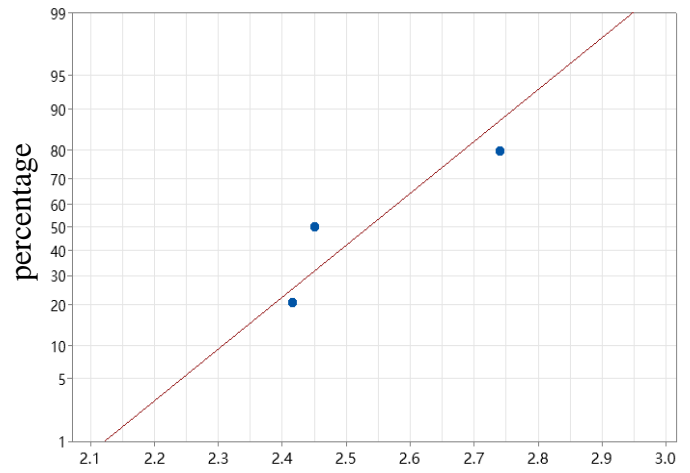

| Process data              |          |
|---------------------------|----------|
| Lower Specification Limit | 1        |
| Upper specification limit | 4        |
| Mean                      | 2.53497  |
| N                         | 3        |
| SD (Overall)              | 0.177659 |
| SD (Within group)         | 0.271454 |

| Overall |      |
|---------|------|
| Pp      | 2.81 |
| PPL     | 2.88 |
| PPU     | 2.75 |
| Ppk     | 2.75 |
| Cpm     | *    |

| Within group |      |
|--------------|------|
| Cp           | 1.84 |
| CPL          | 1.88 |
| CPU          | 1.80 |
| Cpk          | 1.80 |

|         |        |
|---------|--------|
| Mean    | 2.535  |
| SD      | 0.1777 |
| N       | 3      |
| AD      | 0.387  |
| P value | 0.131  |

Fig 6D p-AKT/GAPDH

Control  
process report

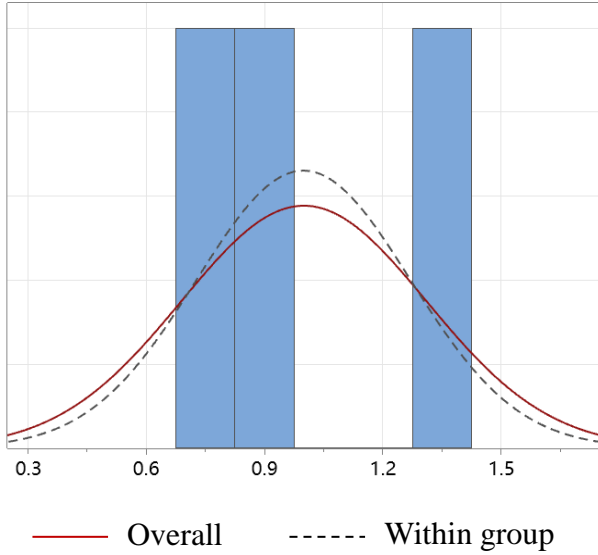

Control  
Normal distribution

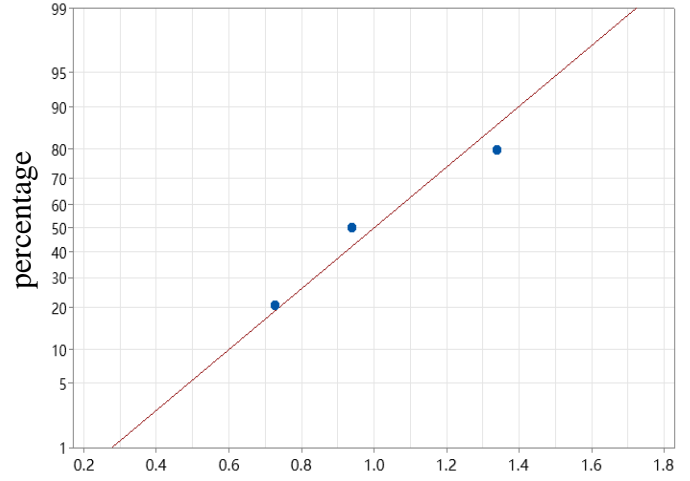

| Process data              |          |
|---------------------------|----------|
| Lower Specification Limit | 0        |
| Upper specification limit | 1.5      |
| Mean                      | 1        |
| N                         | 3        |
| SD (Overall)              | 0.31093  |
| SD (Within group)         | 0.271503 |

|         |        |
|---------|--------|
| Mean    | 1      |
| SD      | 0.3109 |
| N       | 3      |
| AD      | 0.223  |
| P value | 0.508  |

Fig 6D p-AKT/GAPDH

Maresin 1  
process report

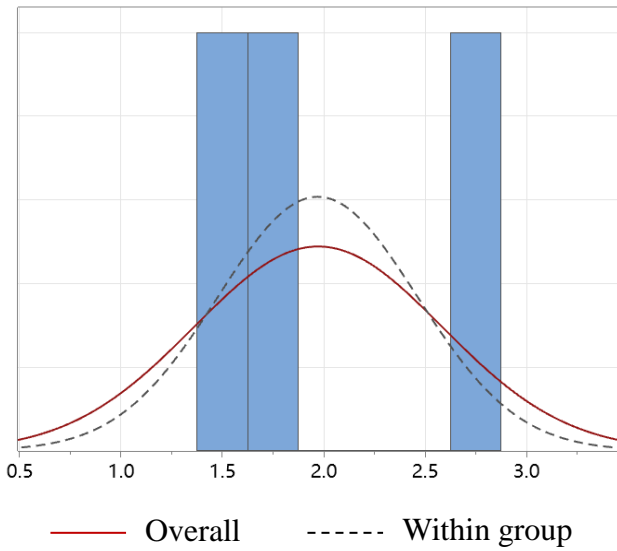

Maresin 1  
Normal distribution

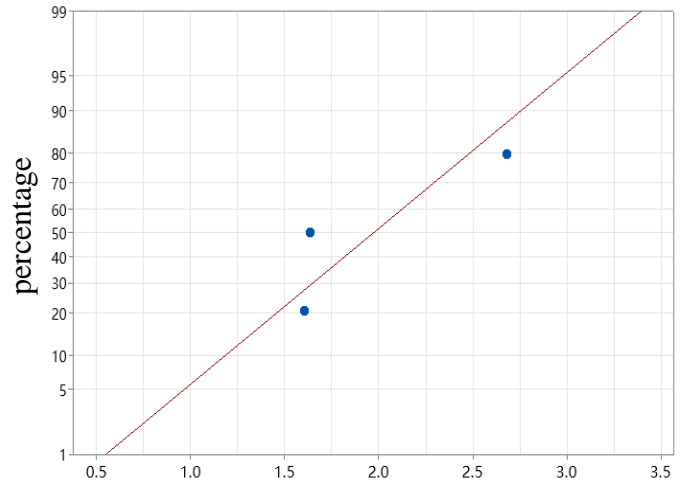

| Process data              |          |
|---------------------------|----------|
| Lower Specification Limit | 0        |
| Upper specification limit | 3        |
| Mean                      | 1.97009  |
| N                         | 3        |
| SD (Overall)              | 0.612245 |
| SD (Within group)         | 0.492434 |

|         |        |
|---------|--------|
| Mean    | 1.972  |
| SD      | 0.6122 |
| N       | 3      |
| AD      | 0.458  |
| P value | 0.073  |

Fig 6D p-AKT/GAPDH

NGF  
process report

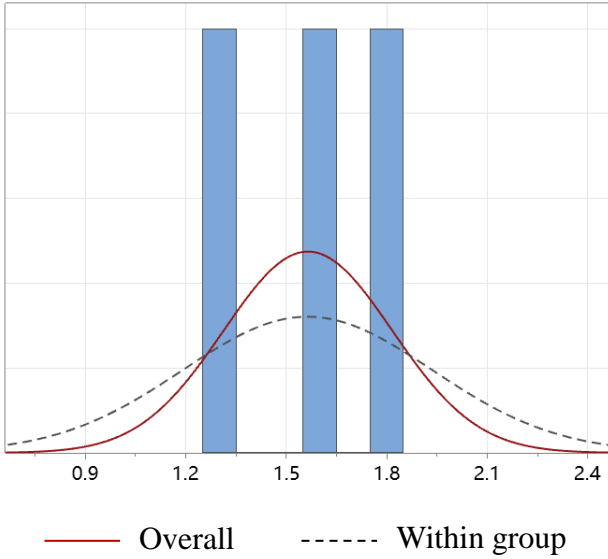

NGF  
Normal distribution

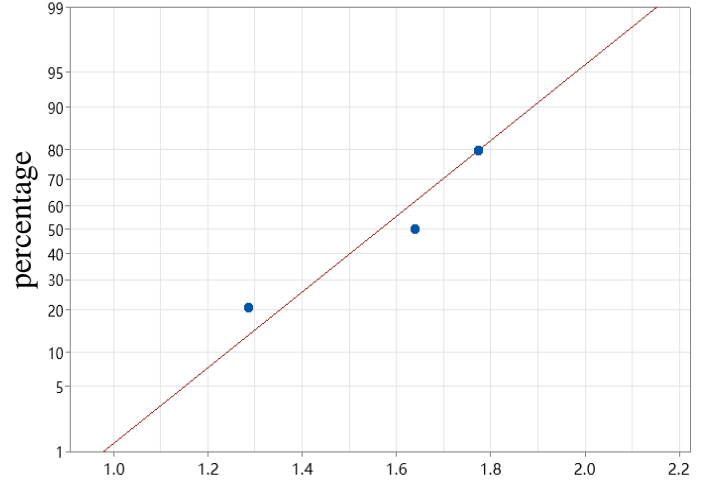

| Process data              |          |
|---------------------------|----------|
| Lower Specification Limit | 0        |
| Upper specification limit | 3        |
| Mean                      | 1.56525  |
| N                         | 3        |
| SD (Overall)              | 0.252193 |
| SD (Within group)         | 0.373339 |

|         |        |
|---------|--------|
| Mean    | 1.565  |
| SD      | 0.2522 |
| N       | 3      |
| AD      | 0.261  |
| P value | 0.378  |

Fig 6D AKT/GAPDH

Control  
process report

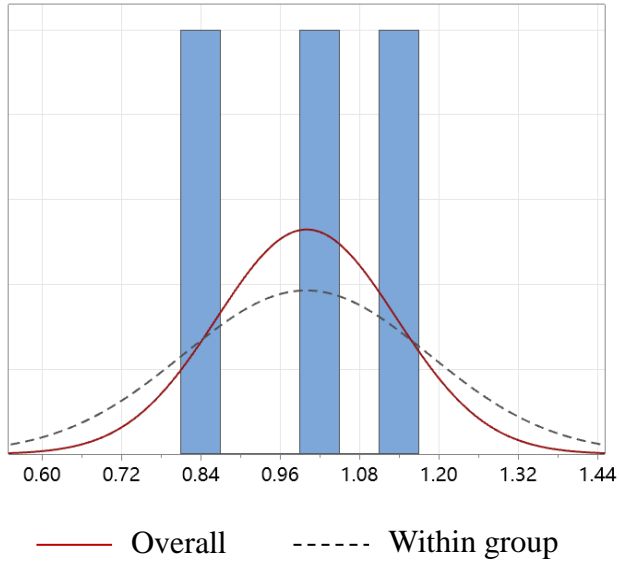

Control  
Normal distribution

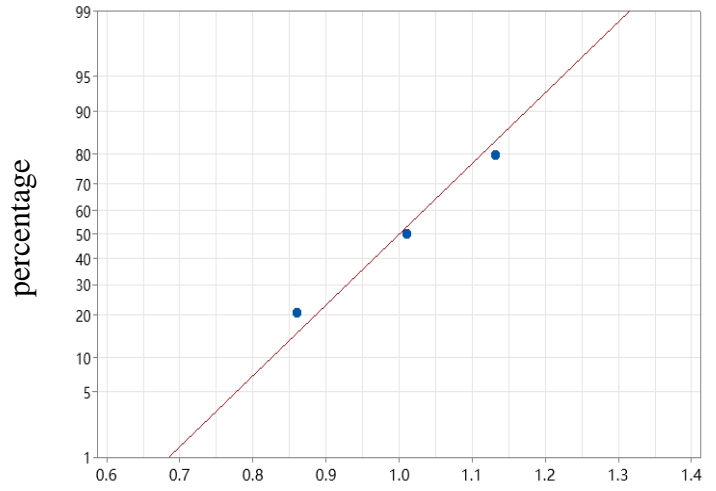

| Process data              |          |
|---------------------------|----------|
| Lower Specification Limit | 0        |
| Upper specification limit | 3        |
| Mean                      | 1        |
| N                         | 3        |
| SD (Overall)              | 0.135625 |
| SD (Within group)         | 0.186267 |

|         |        |
|---------|--------|
| Mean    | 1      |
| SD      | 0.1356 |
| N       | 3      |
| AD      | 0.193  |
| P value | 0.612  |

Fig 6D AKT/GAPDH

Maresin 1  
process report

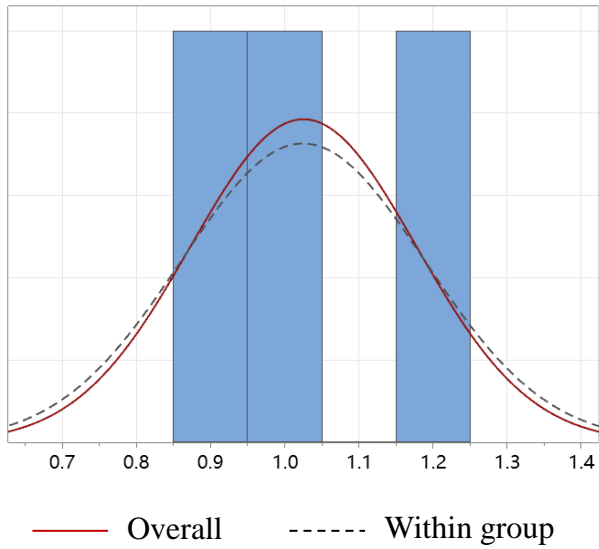

Maresin 1  
Normal distribution

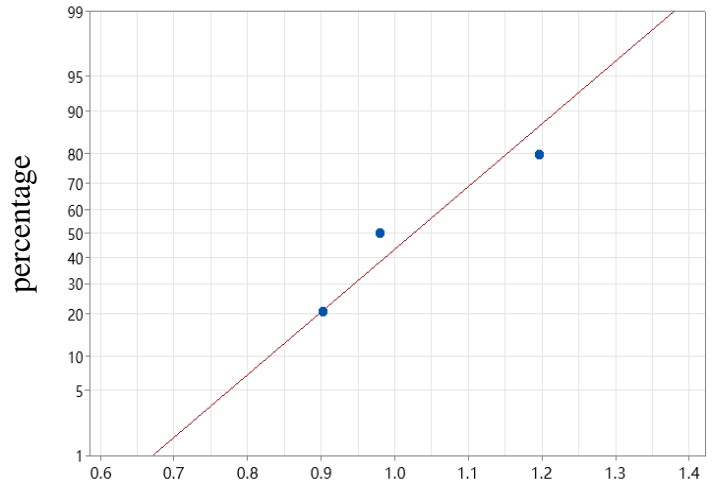

| Process data              |          |
|---------------------------|----------|
| Lower Specification Limit | 0        |
| Upper specification limit | 3        |
| Mean                      | 1.02525  |
| N                         | 3        |
| SD (Overall)              | 0.152395 |
| SD (Within group)         | 0.164687 |

|         |        |
|---------|--------|
| Mean    | 1.025  |
| SD      | 0.1524 |
| N       | 3      |
| AD      | 0.268  |
| P value | 0.358  |

Fig 6D AKT/GAPDH

NGF  
process report

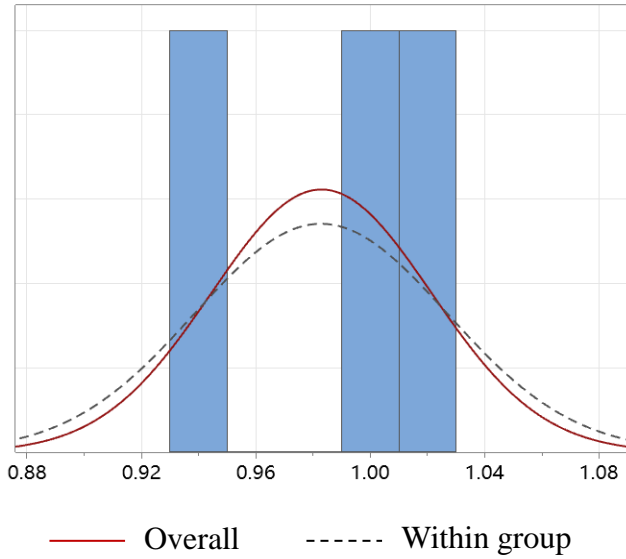

NGF  
Normal distribution

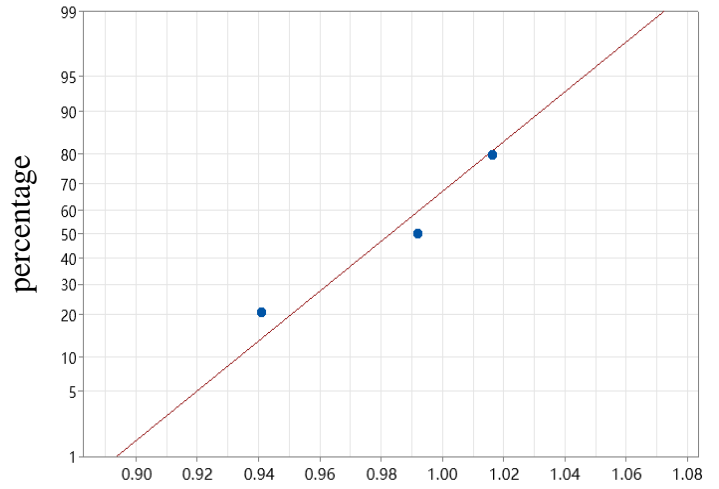

| Process data              |           |
|---------------------------|-----------|
| Lower Specification Limit | 0         |
| Upper specification limit | 3         |
| Mean                      | 0.98295   |
| N                         | 3         |
| SD (Overall)              | 0.0374305 |
| SD (Within group)         | 0.0441986 |

|         |         |
|---------|---------|
| Mean    | 0.9829  |
| SD      | 0.03843 |
| N       | 3       |
| AD      | 0.234   |
| P value | 0.470   |

Fig 6D p-AKT/AKT

Control  
process report

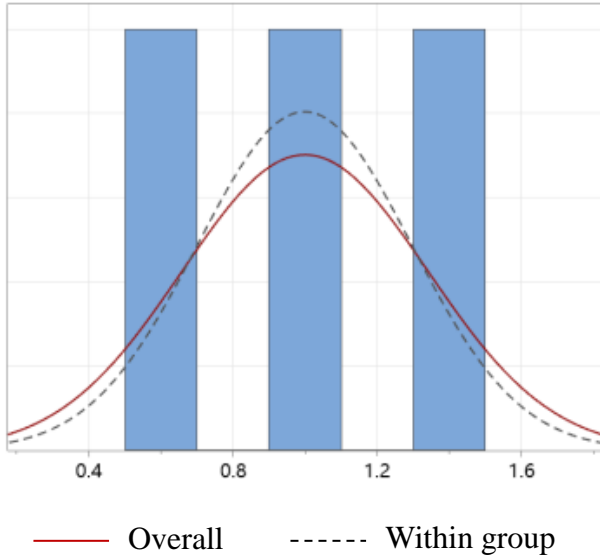

Control  
Normal distribution

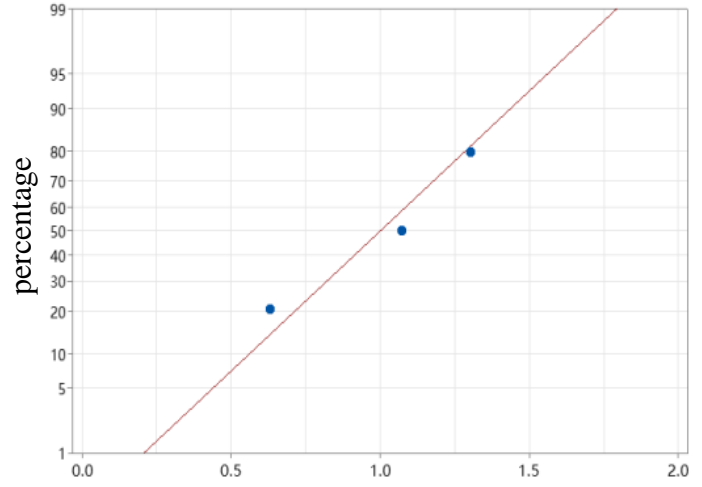

| Process data              |          |
|---------------------------|----------|
| Lower Specification Limit | 0        |
| Upper specification limit | 3        |
| Mean                      | 1        |
| N                         | 3        |
| SD (Overall)              | 0.34115  |
| SD (Within group)         | 0.297513 |

|         |        |
|---------|--------|
| Mean    | 1      |
| SD      | 0.3411 |
| N       | 3      |
| AD      | 0.226  |
| P value | 0.503  |



Fig 6D p-AKT/AKT

Maresin 1  
process report

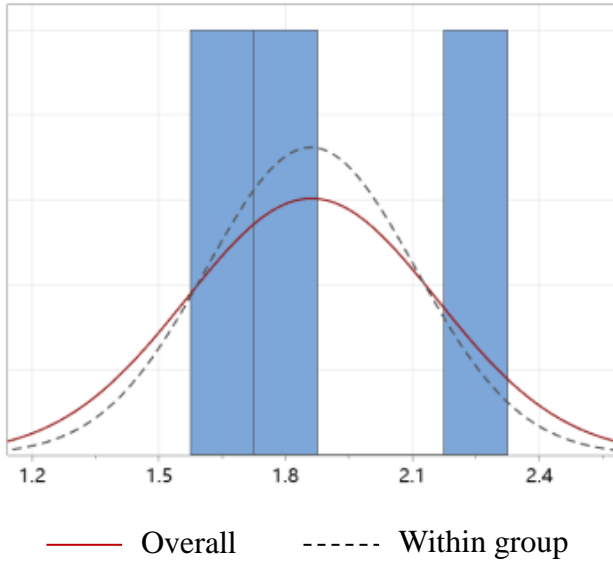

Maresin 1  
Normal distribution

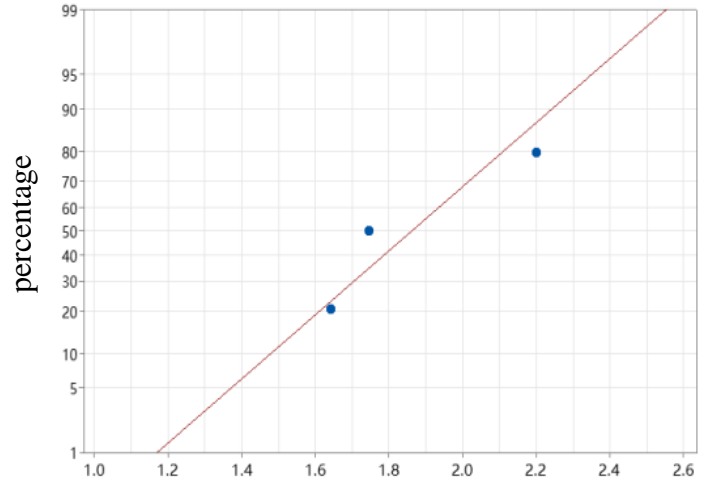

| Process data              |          |
|---------------------------|----------|
| Lower Specification Limit | 0        |
| Upper specification limit | 3        |
| Mean                      | 1.86136  |
| N                         | 3        |
| SD (Overall)              | 0.297453 |
| SD (Within group)         | 0.247916 |

|         |        |
|---------|--------|
| Mean    | 1.861  |
| SD      | 0.2975 |
| N       | 3      |
| AD      | 0.323  |
| P value | 0.228  |

Fig 6D p-AKT/AKT

NGF  
process report

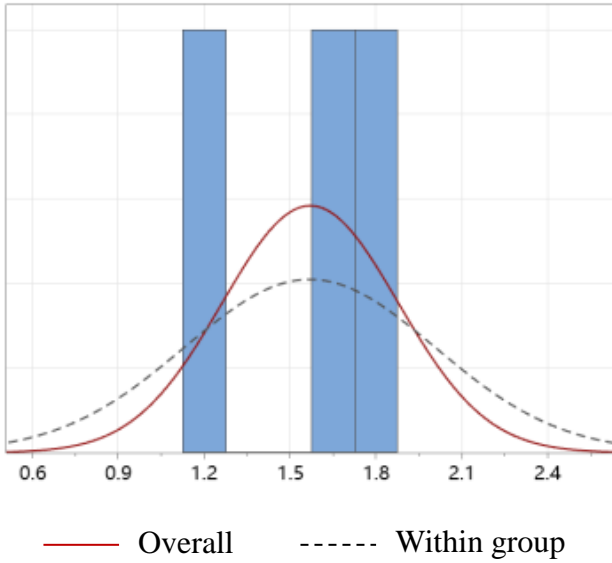

NGF  
Normal distribution

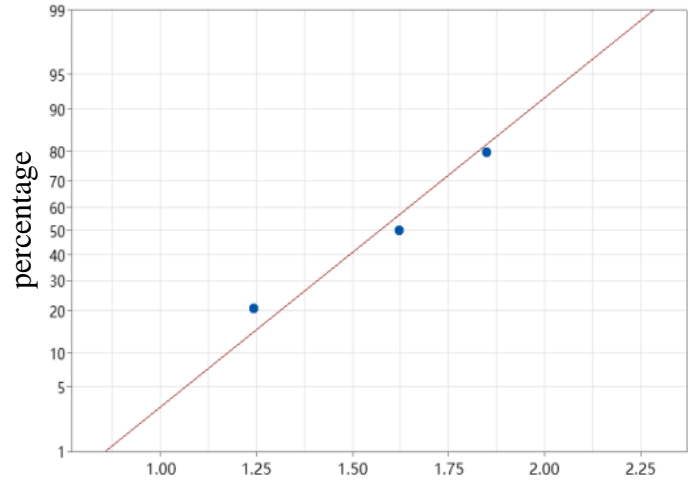

| Process data              |          |
|---------------------------|----------|
| Lower Specification Limit | 0        |
| Upper specification limit | 3        |
| Mean                      | 1.57046  |
| N                         | 3        |
| SD (Overall)              | 0.307454 |
| SD (Within group)         | 0.438596 |

|         |        |
|---------|--------|
| Mean    | 1.570  |
| SD      | 0.3075 |
| N       | 3      |
| AD      | 0.213  |
| P value | 0.535  |

Fig 6D p-ERK/GAPDH

Control  
process report

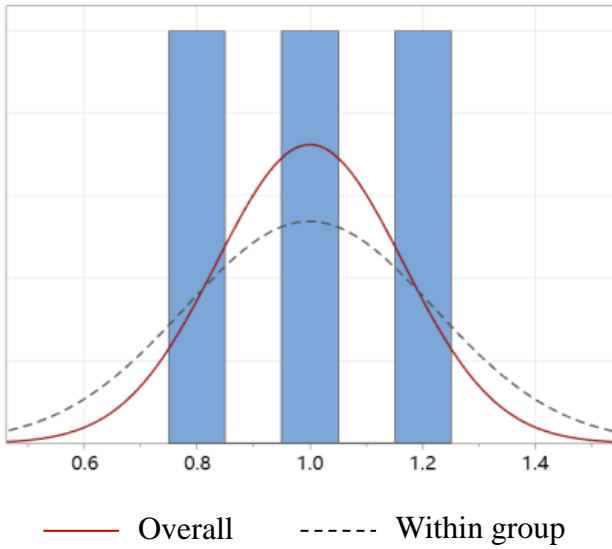

Control  
Normal distribution

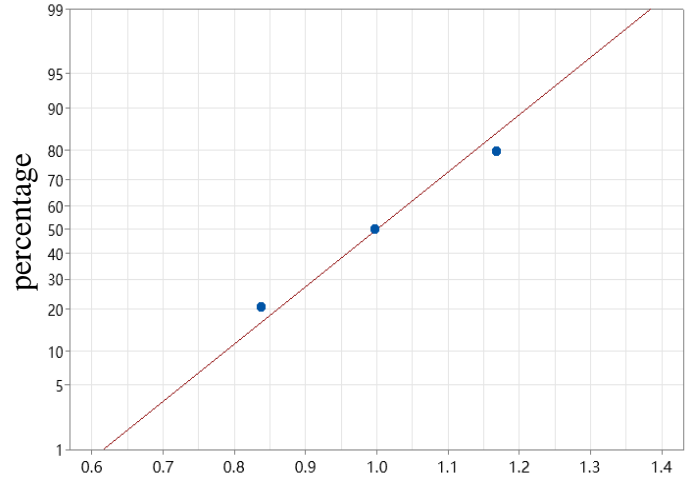

| Process data              |          |
|---------------------------|----------|
| Lower Specification Limit | 0        |
| Upper specification limit | 3        |
| Mean                      | 1        |
| N                         | 3        |
| SD (Overall)              | 0.165292 |
| SD (Within group)         | 0.222481 |

|         |        |
|---------|--------|
| Mean    | 1      |
| SD      | 0.1653 |
| N       | 3      |
| AD      | 0.190  |
| P value | 0.628  |

Fig 6D p-ERK/GAPDH

Maresin 1  
process report

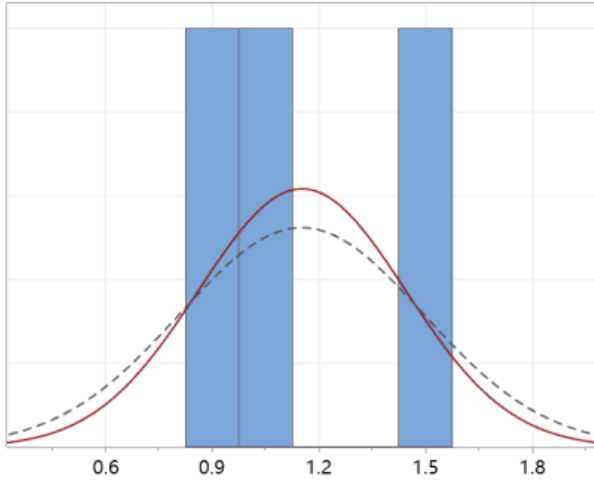

— Overall      - - - - - Within group

Maresin 1  
Normal distribution

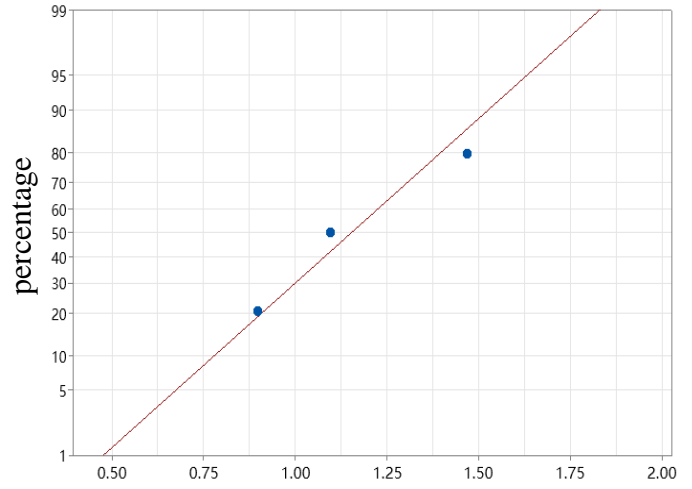

| Process data              |          |
|---------------------------|----------|
| Lower Specification Limit | 0        |
| Upper specification limit | 3        |
| Mean                      | 1.15295  |
| N                         | 3        |
| SD (Overall)              | 0.291149 |
| SD (Within group)         | 0.342681 |

|         |        |
|---------|--------|
| Mean    | 1.153  |
| SD      | 0.2911 |
| N       | 3      |
| AD      | 0.223  |
| P value | 0.508  |

Fig 6D p-ERK/GAPDH

NGF  
process report

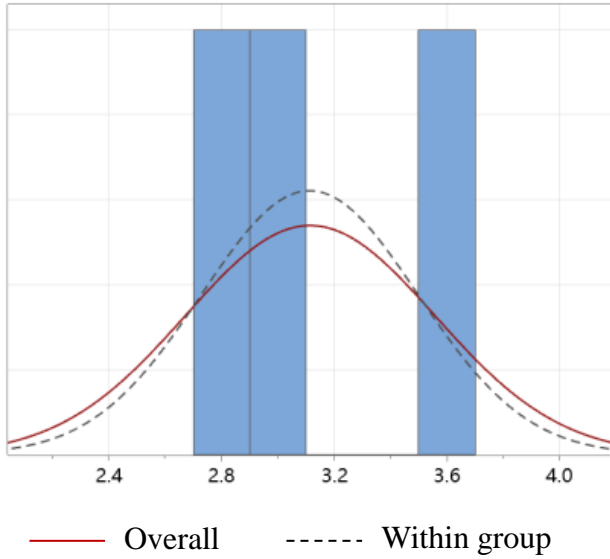

NGF  
Normal distribution

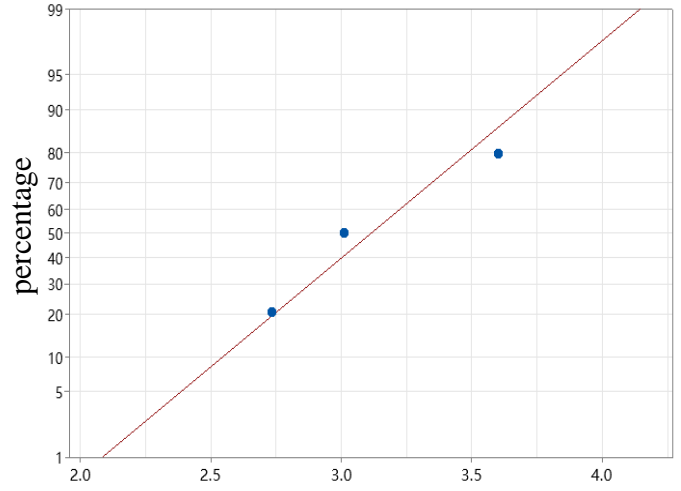

| Process data              |          |
|---------------------------|----------|
| Lower Specification Limit | 0        |
| Upper specification limit | 3        |
| Mean                      | 3.11511  |
| N                         | 3        |
| SD (Overall)              | 0.443453 |
| SD (Within group)         | 0.384926 |

|         |        |
|---------|--------|
| Mean    | 3.115  |
| SD      | 0.4435 |
| N       | 3      |
| AD      | 0.236  |
| P value | 0.463  |

Fig 6D ERK/GAPDH

Control  
process report

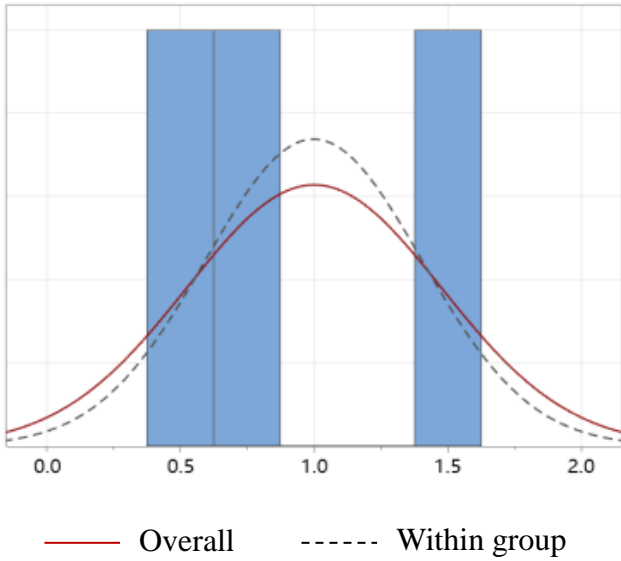

Control  
Normal distribution

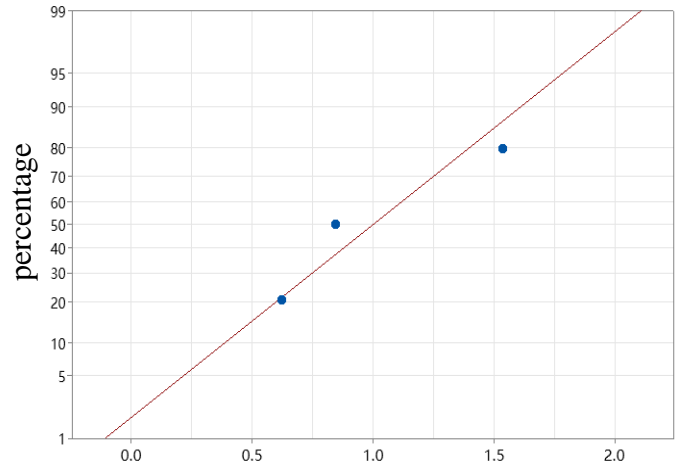

| Process data              |          |
|---------------------------|----------|
| Lower Specification Limit | 0        |
| Upper specification limit | 3        |
| Mean                      | 1        |
| N                         | 3        |
| SD (Overall)              | 0.476455 |
| SD (Within group)         | 0.405293 |

|         |        |
|---------|--------|
| Mean    | 1      |
| SD      | 0.4865 |
| N       | 3      |
| AD      | 0.280  |
| P value | 0.326  |

Fig 6D ERK/GAPDH

Maresin 1  
process report

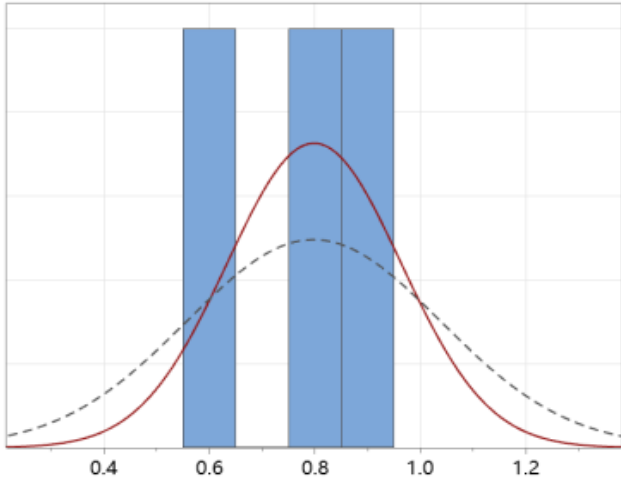

— Overall      - - - - - Within group

Maresin 1  
Normal distribution

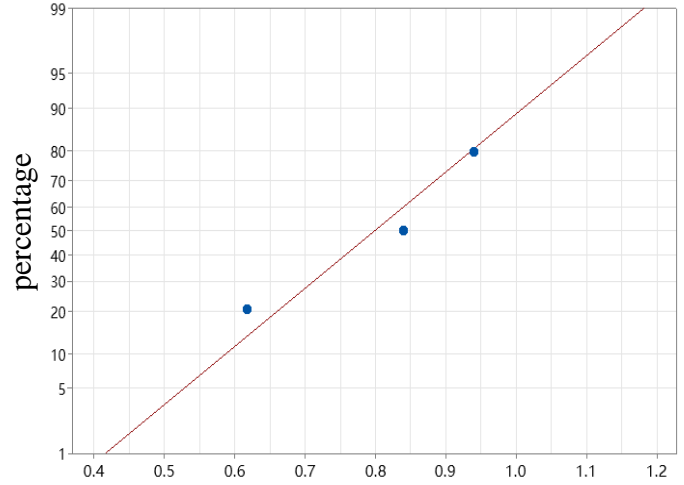

| Process data              |          |
|---------------------------|----------|
| Lower Specification Limit | 0        |
| Upper specification limit | 3        |
| Mean                      | 0.79871  |
| N                         | 3        |
| SD (Overall)              | 0.164758 |
| SD (Within group)         | 0.24117  |

|         |        |
|---------|--------|
| Mean    | 0.7987 |
| SD      | 0.1648 |
| N       | 3      |
| AD      | 0.242  |
| P value | 0.443  |

Fig 6D ERK/GAPDH

NGF  
process report

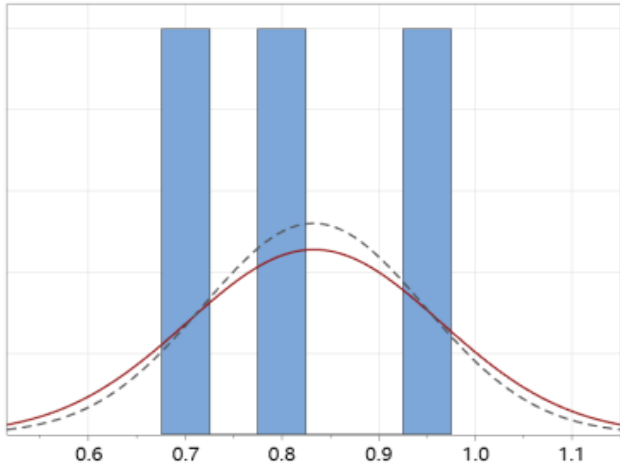

— Overall      - - - - - Within group

NGF  
Normal distribution

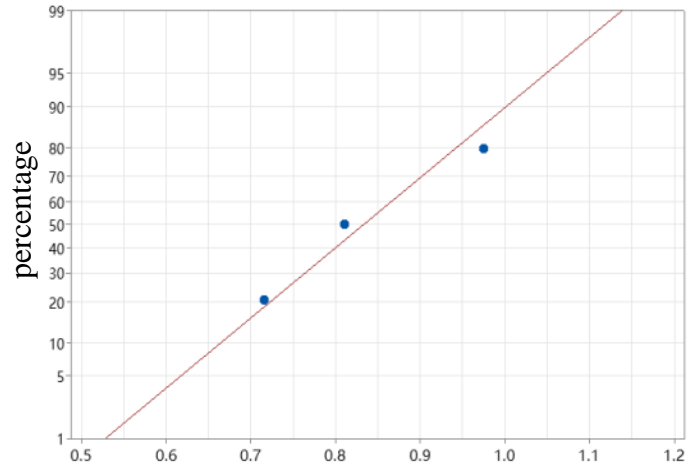

| Process data              |          |
|---------------------------|----------|
| Lower Specification Limit | 0        |
| Upper specification limit | 3        |
| Mean                      | 0.833094 |
| N                         | 3        |
| SD (Overall)              | 0.131272 |
| SD (Within group)         | 0.114989 |

|         |        |
|---------|--------|
| Mean    | 0.8331 |
| SD      | 0.1313 |
| N       | 3      |
| AD      | 0.216  |
| P value | 0.525  |



Fig 6D p-ERK/ERK

Control  
process report

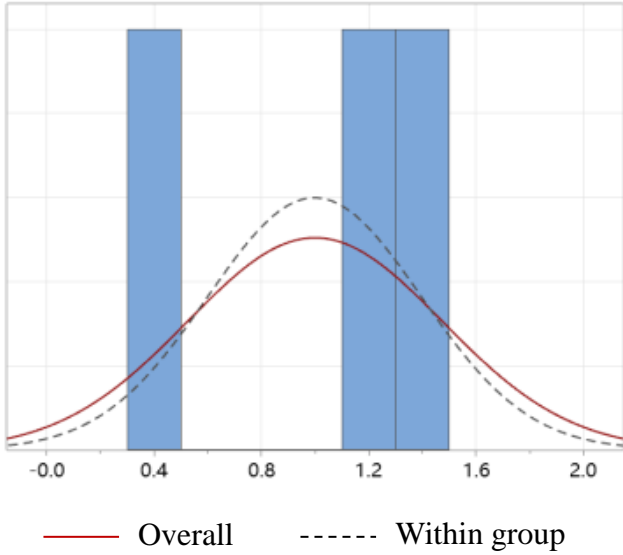

Control  
Normal distribution

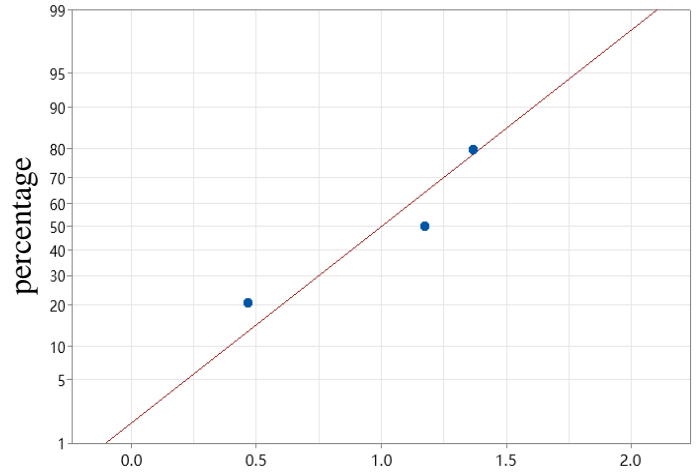

| Process data              |          |
|---------------------------|----------|
| Lower Specification Limit | 0        |
| Upper specification limit | 3        |
| Mean                      | 1        |
| N                         | 3        |
| SD (Overall)              | 0.474591 |
| SD (Within group)         | 0.399161 |

|         |        |
|---------|--------|
| Mean    | 1      |
| SD      | 0.4745 |
| N       | 3      |
| AD      | 0.304  |
| P value | 0.268  |

Fig 6D p-ERK/ERK

Maresin 1  
process report

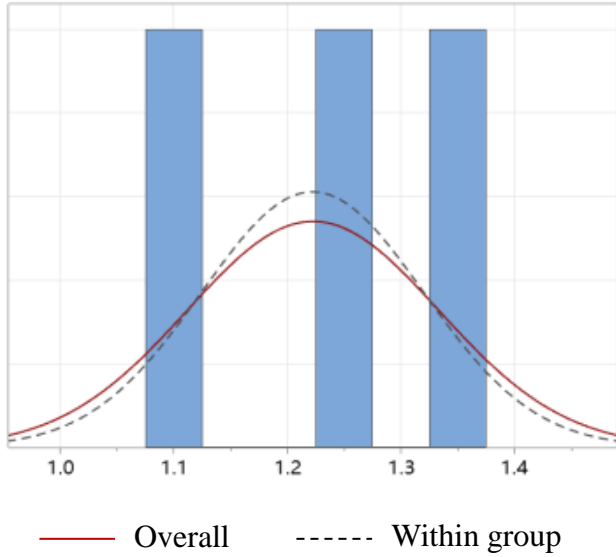

Maresin 1  
Normal distribution

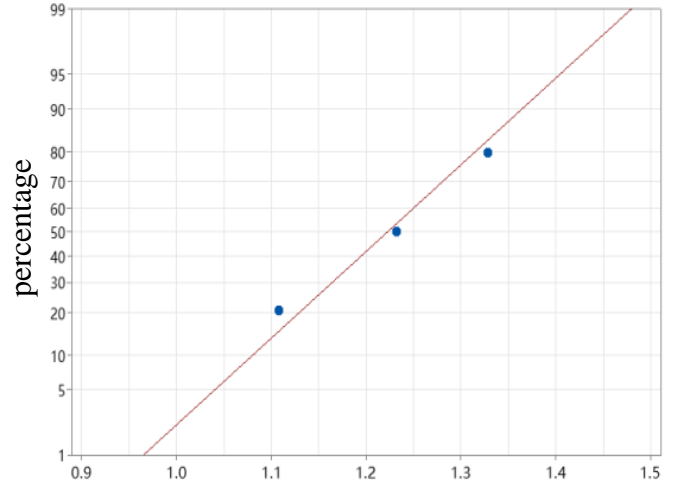

| Process data              |           |
|---------------------------|-----------|
| Lower Specification Limit | 0         |
| Upper specification limit | 3         |
| Mean                      | 1.22251   |
| N                         | 3         |
| SD (Overall)              | 0.110702  |
| SD (Within group)         | 0.0978861 |

|         |        |
|---------|--------|
| Mean    | 1.226  |
| SD      | 0.1107 |
| N       | 3      |
| AD      | 0.195  |
| P value | 0.604  |

Fig 6F p-ERK/ERK

NGF  
process report

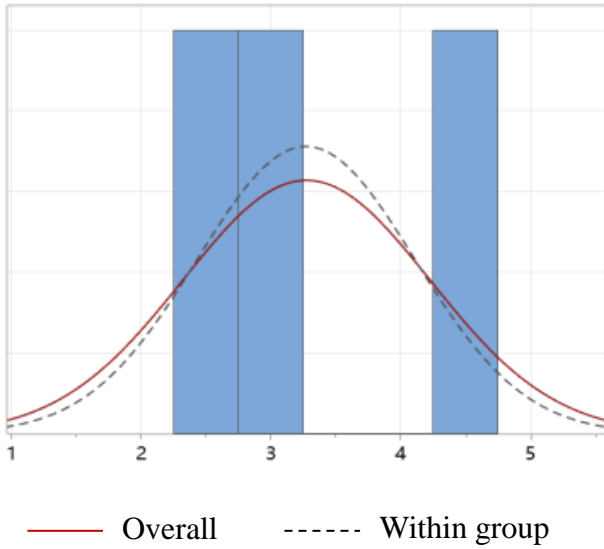

NGF  
Normal distribution

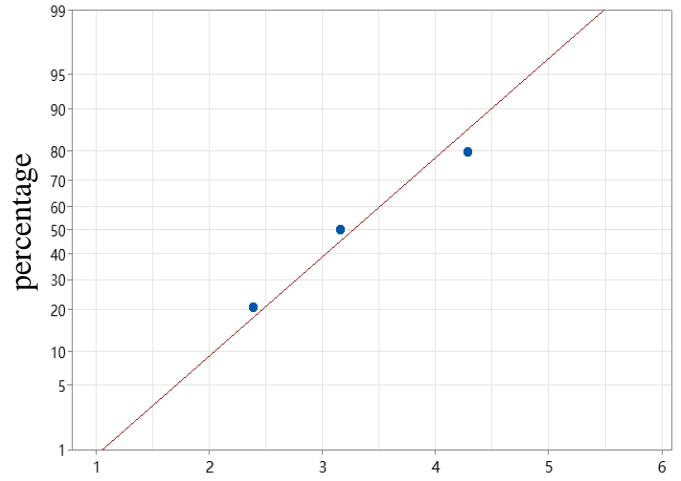

| Process data              |          |
|---------------------------|----------|
| Lower Specification Limit | 0        |
| Upper specification limit | 3        |
| Mean                      | 3.27268  |
| N                         | 3        |
| SD (Overall)              | 0.953012 |
| SD (Within group)         | 0.840288 |

|         |       |
|---------|-------|
| Mean    | 3.273 |
| SD      | 0.953 |
| N       | 3     |
| AD      | 0.202 |
| P value | 0.576 |

Fig 6F p-mTOR/GAPDH

Control  
process report

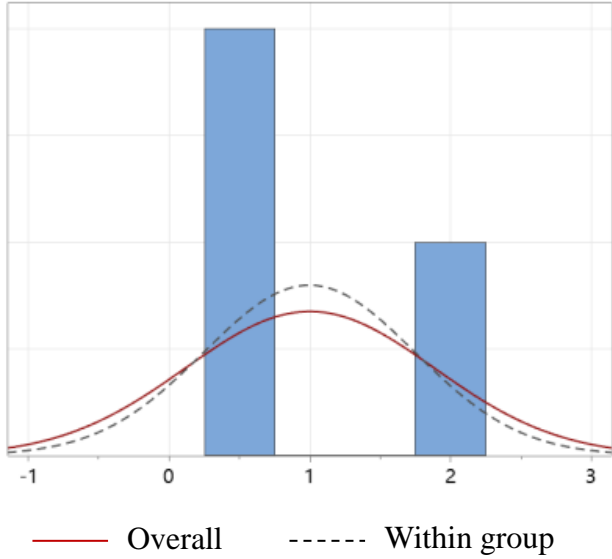

Control  
Normal distribution

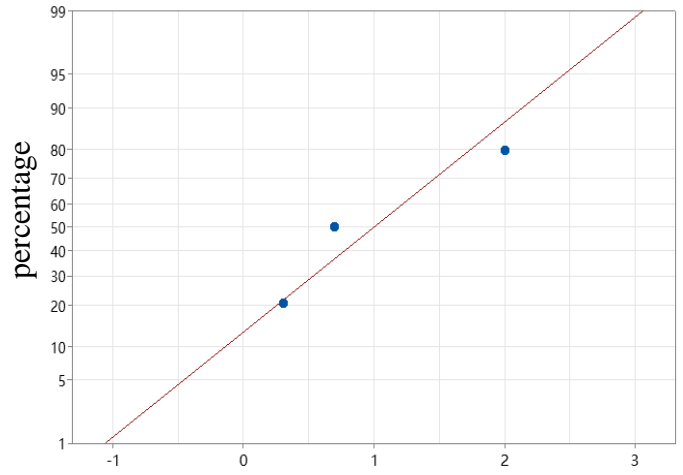

| Process data              |          |
|---------------------------|----------|
| Lower Specification Limit | 0        |
| Upper specification limit | 3        |
| Mean                      | 1        |
| N                         | 3        |
| SD (Overall)              | 0.882656 |
| SD (Within group)         | 0.750009 |

|         |        |
|---------|--------|
| Mean    | 1      |
| SD      | 0.8863 |
| N       | 3      |
| AD      | 0.291  |
| P value | 0.298  |

Fig 6F p-mTOR/GAPDH

Maresin 1  
process report

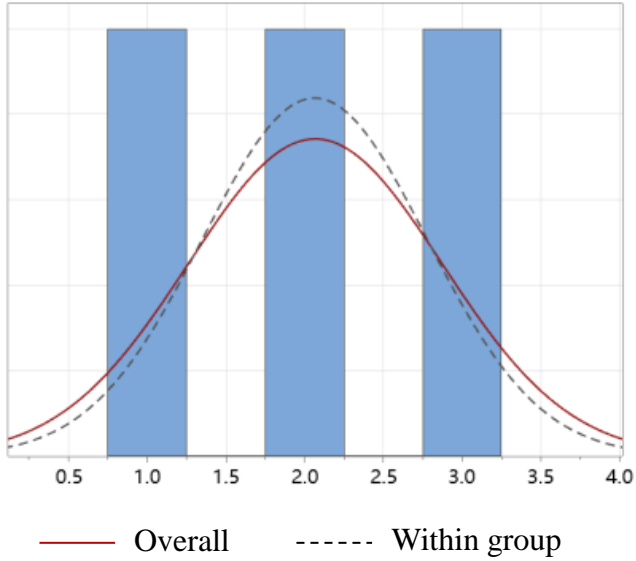

Maresin 1  
Normal distribution

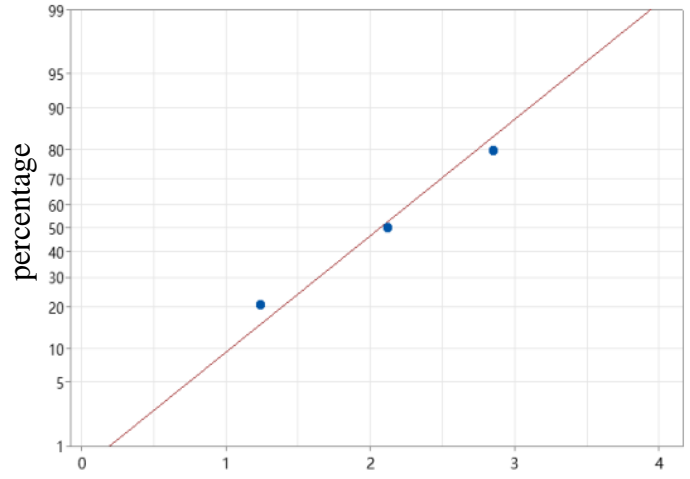

| Process data              |          |
|---------------------------|----------|
| Lower Specification Limit | 0        |
| Upper specification limit | 3        |
| Mean                      | 2.06707  |
| N                         | 3        |
| SD (Overall)              | 0.805958 |
| SD (Within group)         | 0.713435 |

|         |       |
|---------|-------|
| Mean    | 2.067 |
| SD      | 0.806 |
| N       | 3     |
| AD      | 0.193 |
| P value | 0.615 |

Fig 6F p-mTOR/GAPDH

NGF  
process report

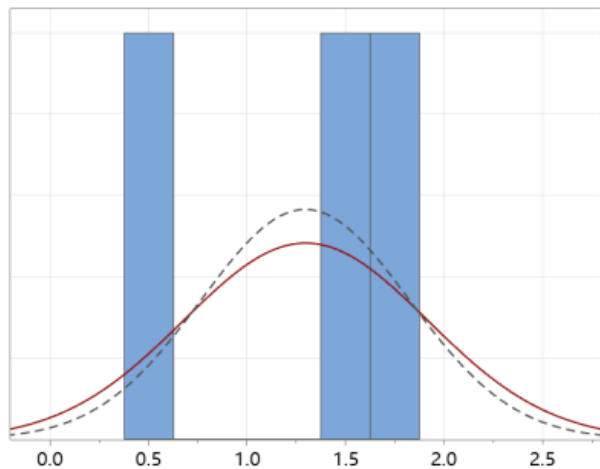

— Overall      - - - - - Within group

| Process data              |          |
|---------------------------|----------|
| Lower Specification Limit | 0        |
| Upper specification limit | 3        |
| Mean                      | 1.29742  |
| N                         | 3        |
| SD (Overall)              | 0.619381 |
| SD (Within group)         | 0.528852 |

NGF  
Normal distribution

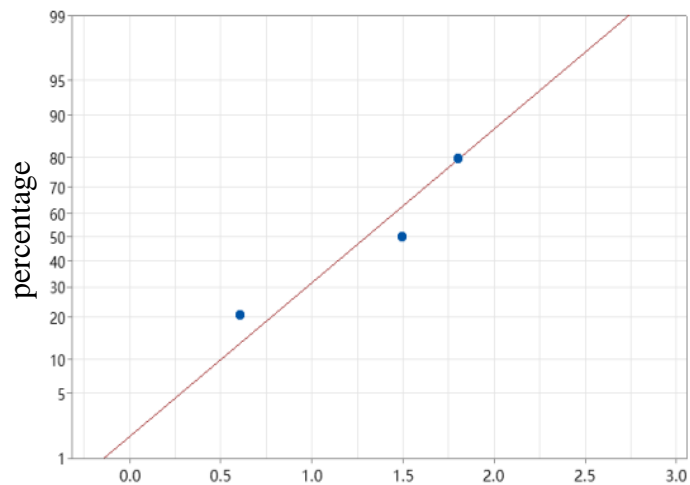

|         |        |
|---------|--------|
| Mean    | 1.297  |
| SD      | 0.6194 |
| N       | 3      |
| AD      | 0.272  |
| P value | 0.348  |

Fig 6F mTOR/GAPDH

Control  
process report

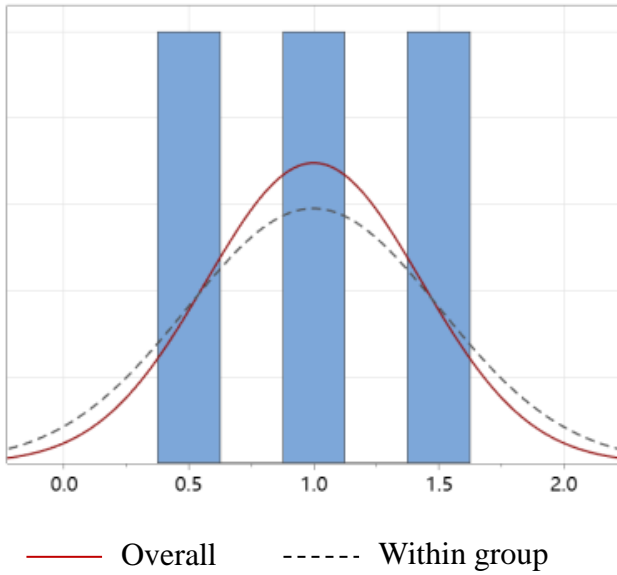

Control  
Normal distribution

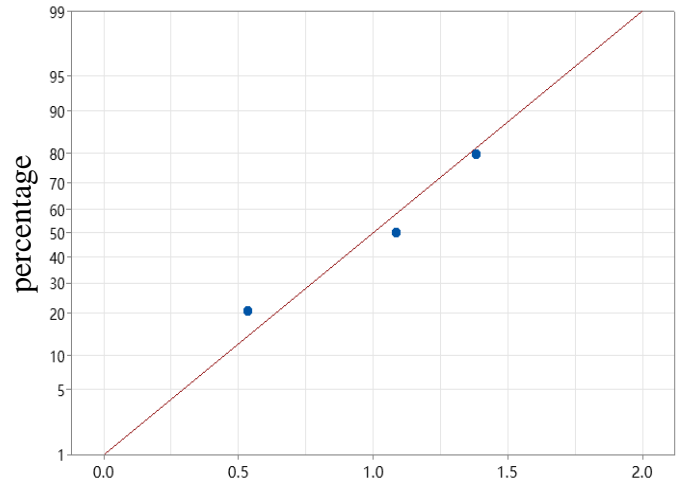

| Process data              |          |
|---------------------------|----------|
| Lower Specification Limit | 0        |
| Upper specification limit | 3        |
| Mean                      | 1        |
| N                         | 3        |
| SD (Overall)              | 0.429896 |
| SD (Within group)         | 0.506602 |

|         |        |
|---------|--------|
| Mean    | 1      |
| SD      | 0.4299 |
| N       | 3      |
| AD      | 0.223  |
| P value | 0.509  |

Fig 6F mTOR/GAPDH

Maresin 1  
process report

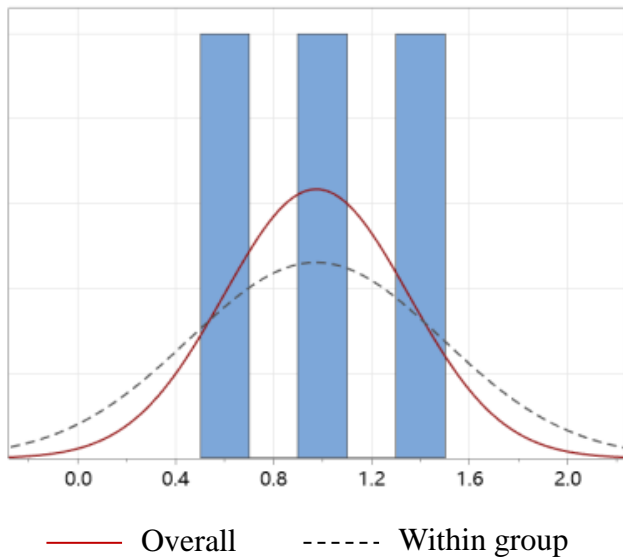

Maresin 1  
Normal distribution

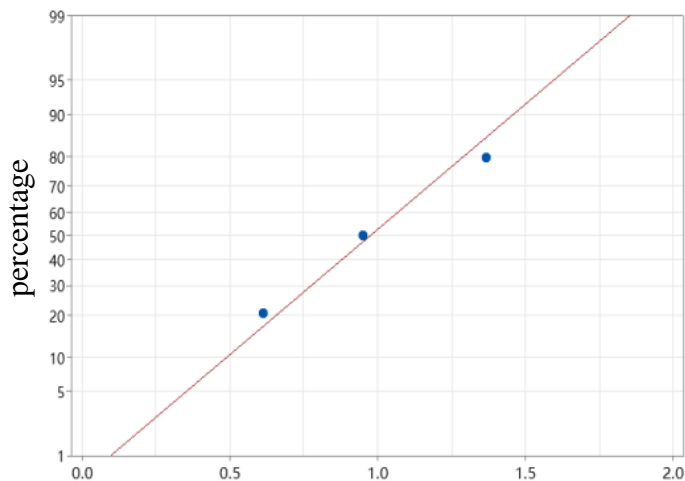

| Process data              |          |
|---------------------------|----------|
| Lower Specification Limit | 0        |
| Upper specification limit | 3        |
| Mean                      | 0.974321 |
| N                         | 3        |
| SD (Overall)              | 0.377658 |
| SD (Within group)         | 0.519148 |

|         |        |
|---------|--------|
| Mean    | 0.9743 |
| SD      | 0.3777 |
| N       | 3      |
| AD      | 0.194  |
| P value | 0.611  |



Fig 6F mTOR/GAPDH

NGF  
process report

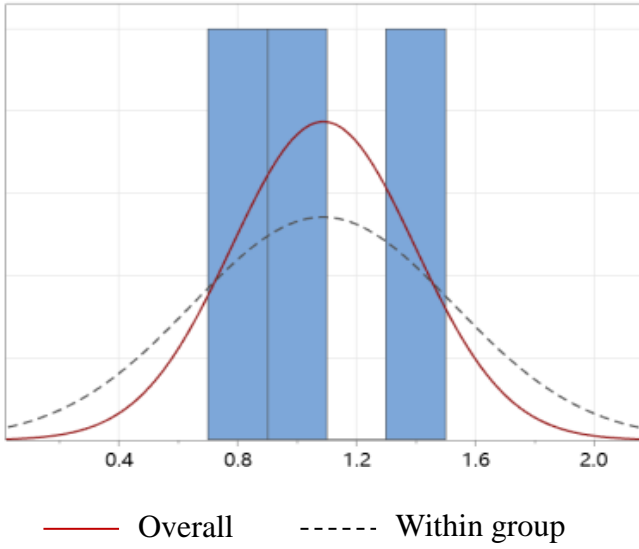

NGF  
Normal distribution

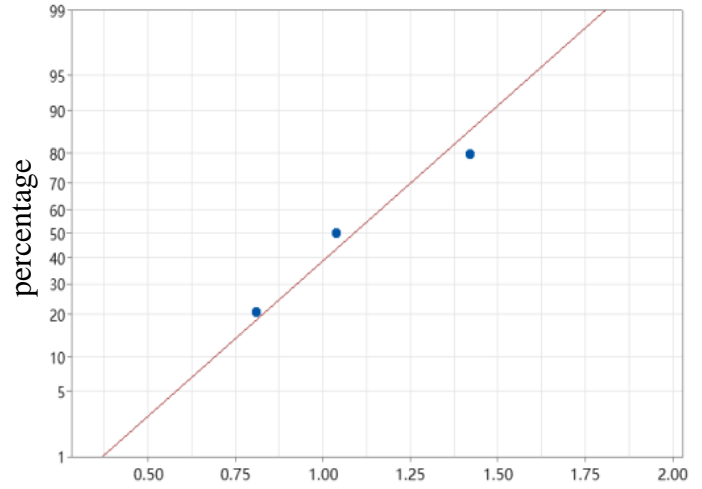

| Process data              |          |
|---------------------------|----------|
| Lower Specification Limit | 0        |
| Upper specification limit | 3        |
| Mean                      | 1.08844  |
| N                         | 3        |
| SD (Overall)              | 0.309237 |
| SD (Within group)         | 0.441595 |

|         |        |
|---------|--------|
| Mean    | 1.088  |
| SD      | 0.3092 |
| N       | 3      |
| AD      | 0.214  |
| P value | 0.532  |

Fig 6F p-mTOR/mTOR

Control  
process report

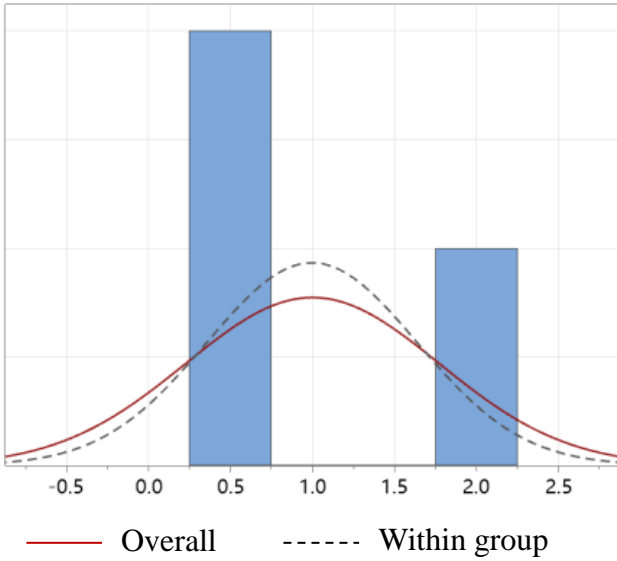

Control  
Normal distribution

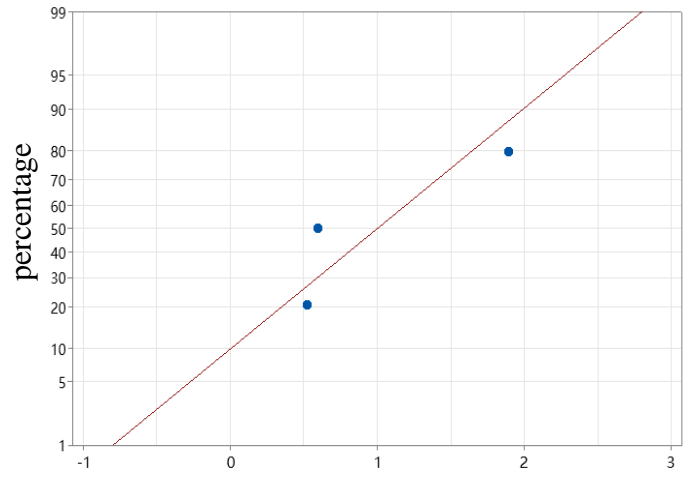

| Process data              |          |
|---------------------------|----------|
| Lower Specification Limit | 0        |
| Upper specification limit | 3        |
| Mean                      | 1        |
| N                         | 3        |
| SD (Overall)              | 0.774038 |
| SD (Within group)         | 0.641854 |

|         |        |
|---------|--------|
| Mean    | 1      |
| SD      | 0.7740 |
| N       | 3      |
| AD      | 0.438  |
| P value | 0.087  |

Fig 6F p-mTOR/mTOR

Maresin 1  
process report

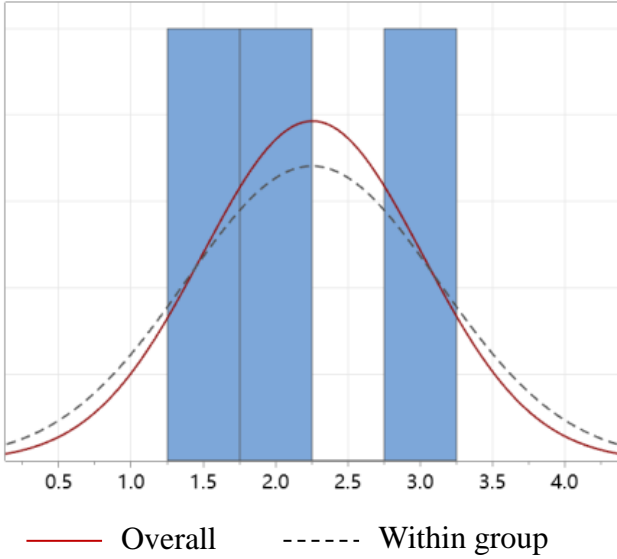

Maresin 1  
Normal distribution

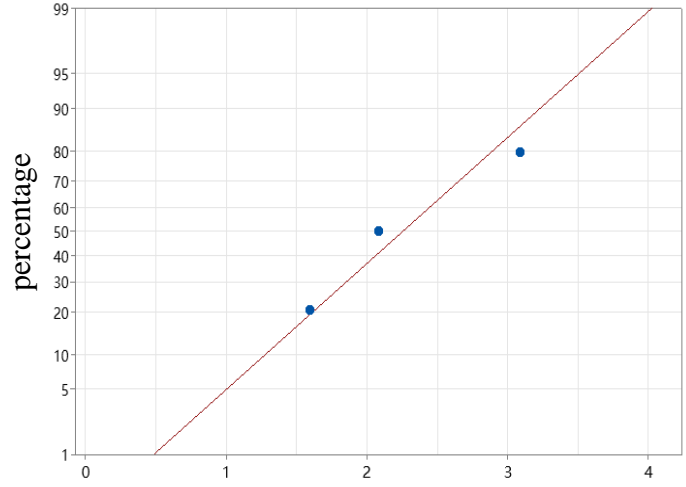

| Process data              |          |
|---------------------------|----------|
| Lower Specification Limit | 0        |
| Upper specification limit | 3        |
| Mean                      | 2.25464  |
| N                         | 3        |
| SD (Overall)              | 0.76141  |
| SD (Within group)         | 0.877207 |

|         |        |
|---------|--------|
| Mean    | 2.255  |
| SD      | 0.7614 |
| N       | 3      |
| AD      | 0.233  |
| P value | 0.473  |

Fig 6F p-mTOR/mTOR

NGF  
process report

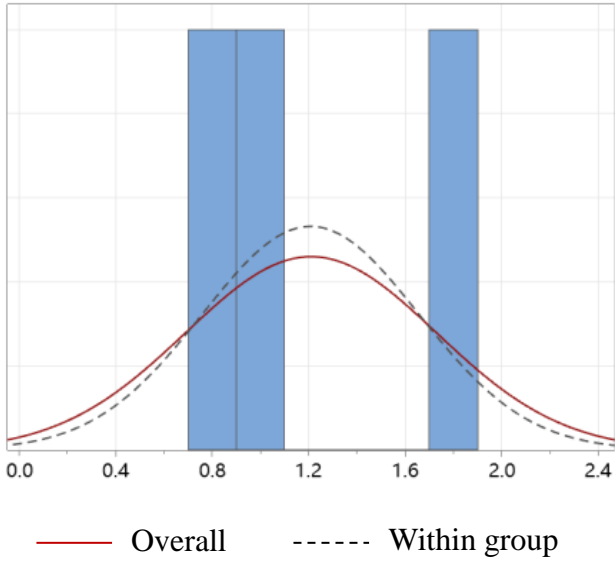

NGF  
Normal distribution

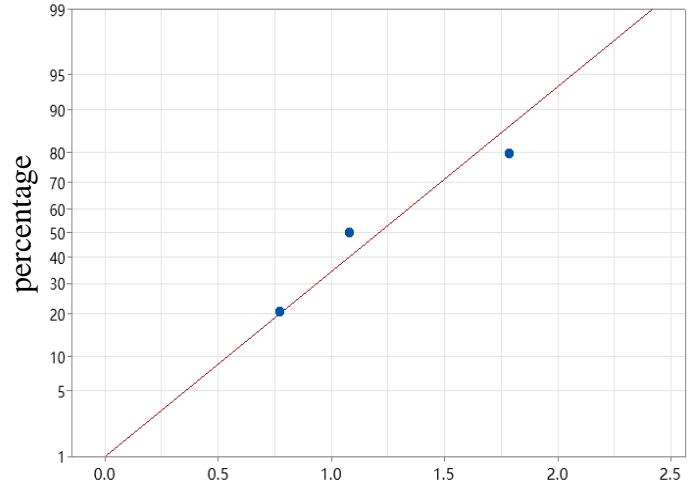

| Process data              |          |
|---------------------------|----------|
| Lower Specification Limit | 0        |
| Upper specification limit | 3        |
| Mean                      | 1.20989  |
| N                         | 3        |
| SD (Overall)              | 0.520171 |
| SD (Within group)         | 0.449873 |

|         |        |
|---------|--------|
| Mean    | 1.210  |
| SD      | 0.5202 |
| N       | 3      |
| AD      | 0.244  |
| P value | 0.435  |

Fig 6F p-PI3K/GAPDH

Control  
process report

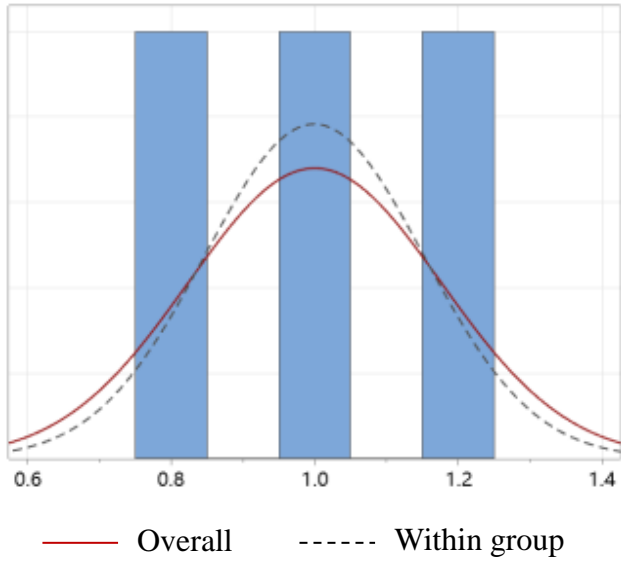

Control  
Normal distribution

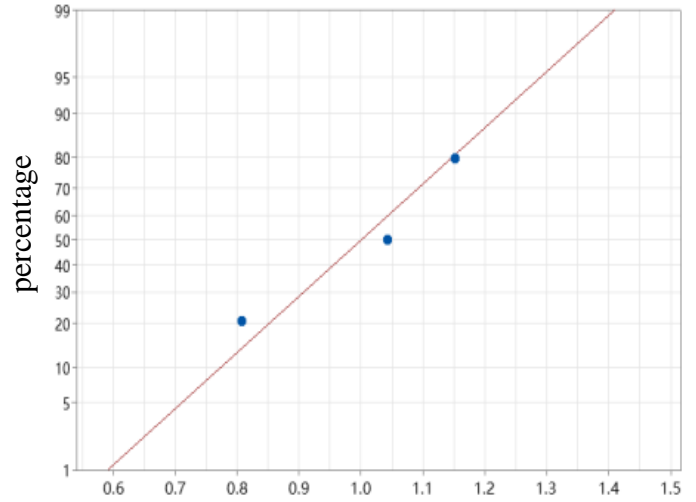

| Process data              |          |
|---------------------------|----------|
| Lower Specification Limit | 0        |
| Upper specification limit | 3        |
| Mean                      | 1        |
| N                         | 3        |
| SD (Overall)              | 0.170618 |
| SD (Within group)         | 0.1527   |

|         |       |
|---------|-------|
| Mean    | 1     |
| SD      | 0.176 |
| N       | 3     |
| AD      | 0.237 |
| P value | 0.458 |

Fig 6F p-PI3K/GAPDH

Maresin 1  
process report

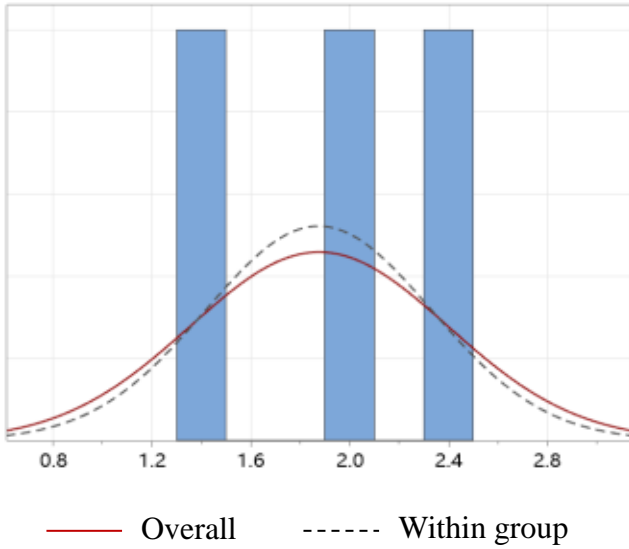

Maresin 1  
Normal distribution

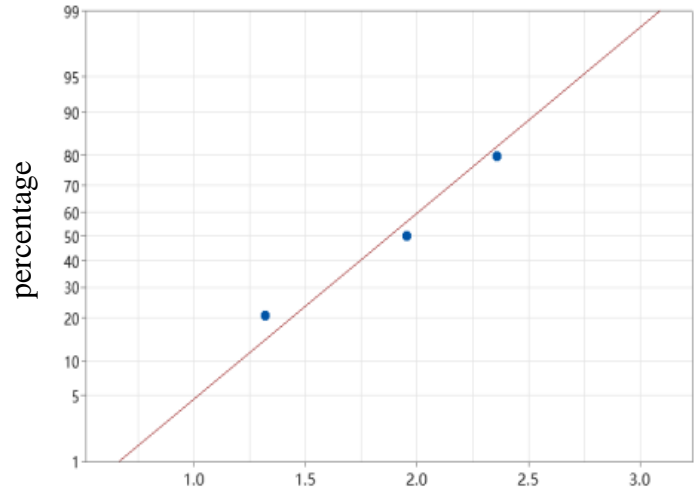

| Process data              |          |
|---------------------------|----------|
| Lower Specification Limit | 0        |
| Upper specification limit | 3        |
| Mean                      | 1.87655  |
| N                         | 3        |
| SD (Overall)              | 0.521674 |
| SD (Within group)         | 0.458597 |

|         |        |
|---------|--------|
| Mean    | 1.877  |
| SD      | 0.5217 |
| N       | 3      |
| AD      | 0.208  |
| P value | 0.550  |

Fig 6F p-PI3K/GAPDH

NGF  
process report

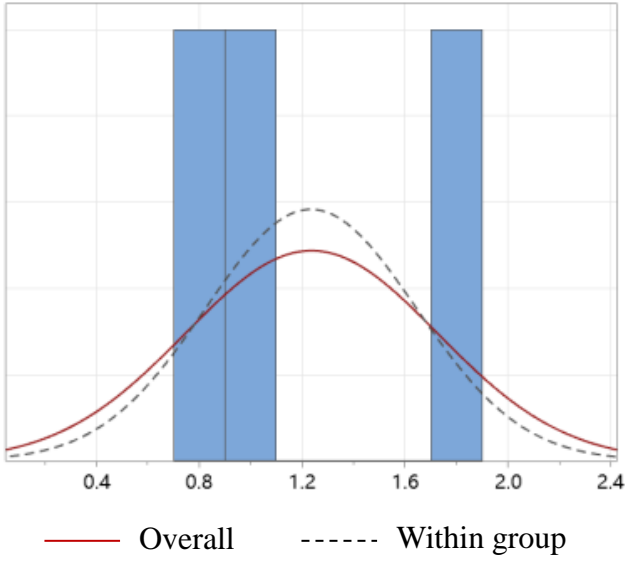

NGF  
Normal distribution

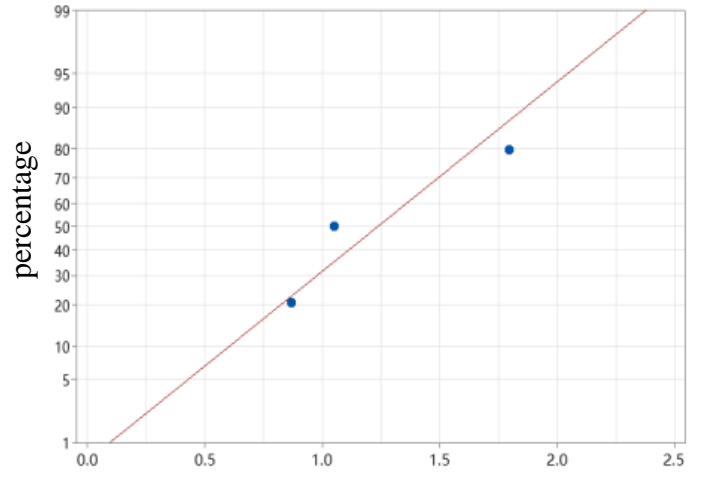

| Process data              |          |
|---------------------------|----------|
| Lower Specification Limit | 0        |
| Upper specification limit | 3        |
| Mean                      | 1.23649  |
| N                         | 3        |
| SD (Overall)              | 0.49094  |
| SD (Within group)         | 0.410258 |

|         |        |
|---------|--------|
| Mean    | 1.266  |
| SD      | 0.4909 |
| N       | 3      |
| AD      | 0.317  |
| P value | 0.239  |

Fig 6F PI3K/GAPDH

Control  
process report

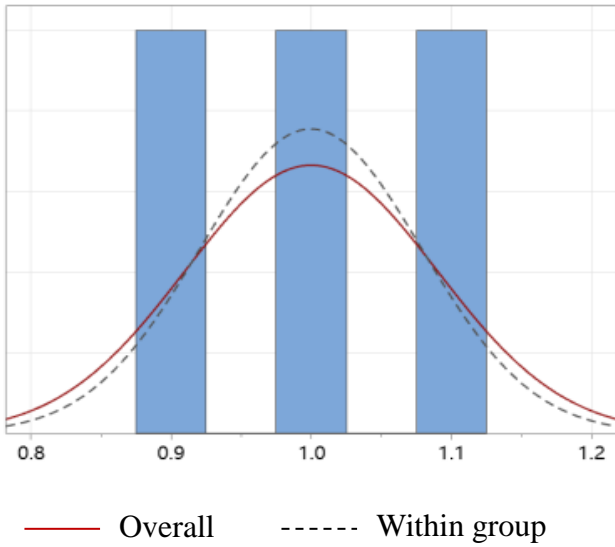

Control  
Normal distribution

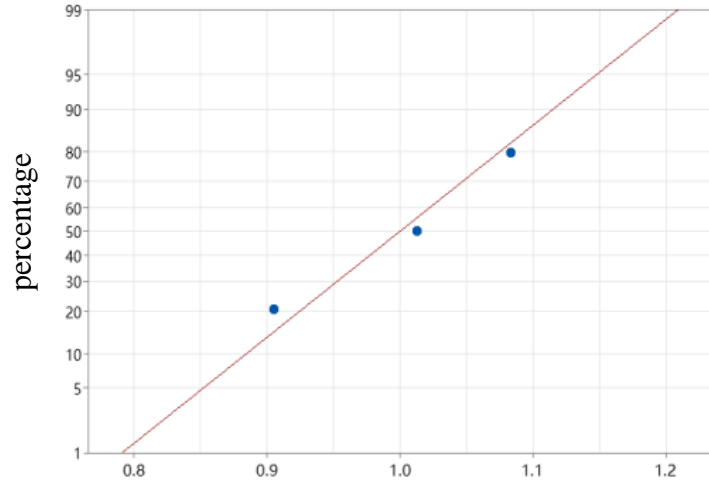

| Process data              |           |
|---------------------------|-----------|
| Lower Specification Limit | 0         |
| Upper specification limit | 3         |
| Mean                      | 1         |
| N                         | 3         |
| SD (Overall)              | 0.0899645 |
| SD (Within group)         | 0.0792083 |

|         |         |
|---------|---------|
| Mean    | 1       |
| SD      | 0.08996 |
| N       | 3       |
| AD      | 0.205   |
| P value | 0.563   |



Fig 6F PI3K/GAPDH

Maresin 1  
process report

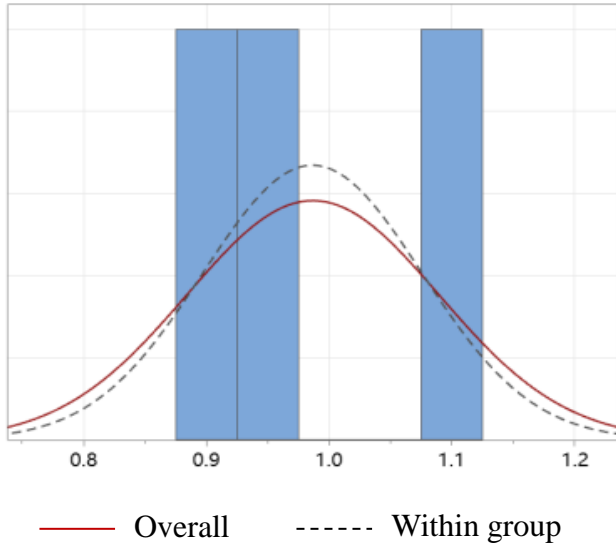

Maresin 1  
Normal distribution

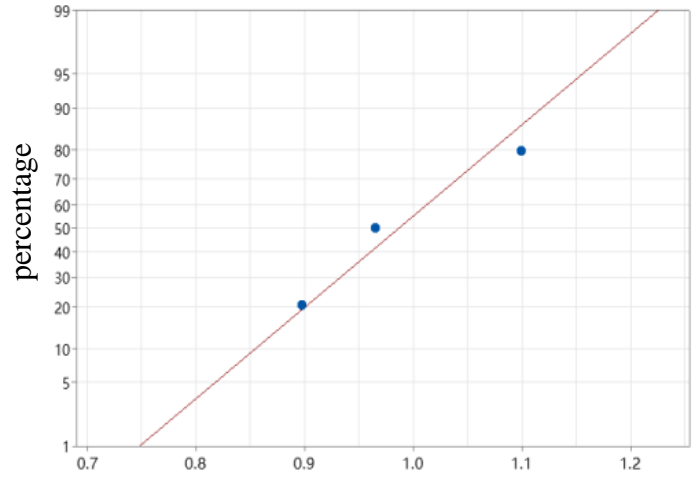

| Process data              |          |
|---------------------------|----------|
| Lower Specification Limit | 0        |
| Upper specification limit | 3        |
| Mean                      | 0.986831 |
| N                         | 3        |
| SD (Overall)              | 0.102702 |
| SD (Within group)         | 0.084473 |

|         |        |
|---------|--------|
| Mean    | 0.9868 |
| SD      | 0.1027 |
| N       | 3      |
| AD      | 0.229  |
| P value | 0.491  |

Fig 6F PI3K/GAPDH

NGF  
process report

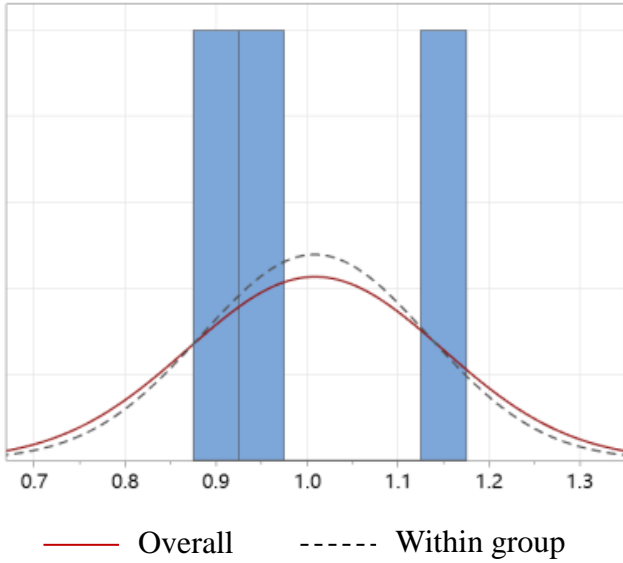

NGF  
Normal distribution

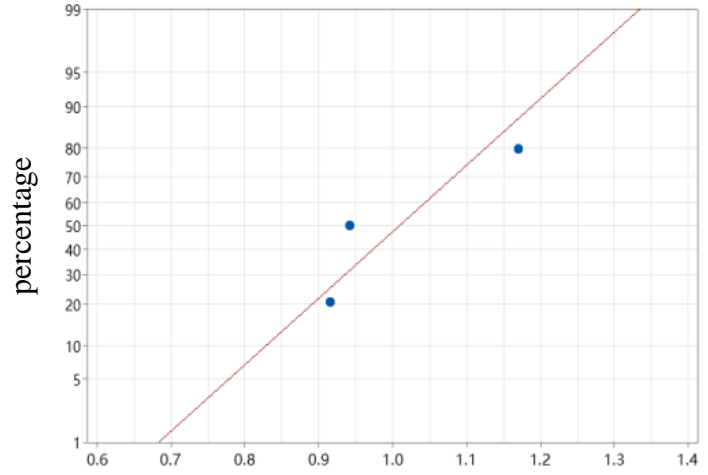

| Process data              |          |
|---------------------------|----------|
| Lower Specification Limit | 0        |
| Upper specification limit | 3        |
| Mean                      | 1.00879  |
| N                         | 3        |
| SD (Overall)              | 0.140144 |
| SD (Within group)         | 0.125043 |

|         |        |
|---------|--------|
| Mean    | 1.009  |
| SD      | 0.1401 |
| N       | 3      |
| AD      | 0.390  |
| P value | 0.128  |

Fig 6F p-PI3K/PI3K

Control  
process report

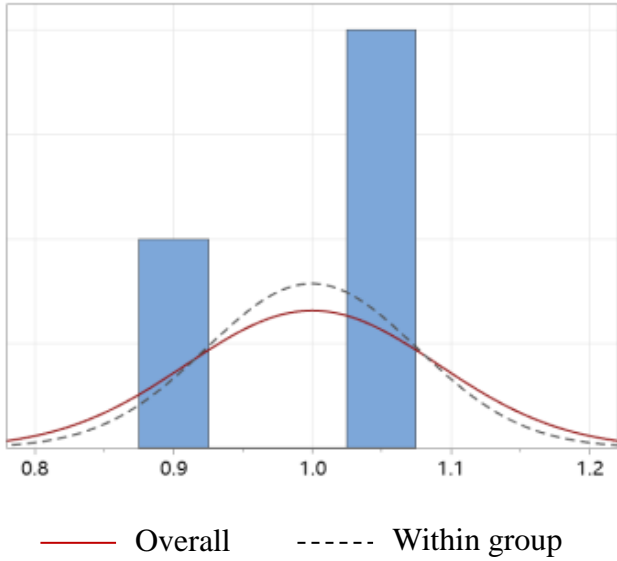

Control  
Normal distribution

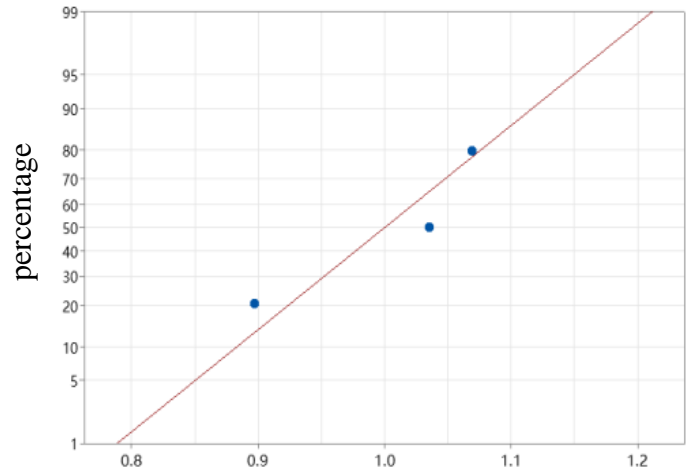

| Process data              |           |
|---------------------------|-----------|
| Lower Specification Limit | 0         |
| Upper specification limit | 3         |
| Mean                      | 1         |
| N                         | 3         |
| SD (Overall)              | 0.0910364 |
| SD (Within group)         | 0.0761467 |

|         |         |
|---------|---------|
| Mean    | 1       |
| SD      | 0.09104 |
| N       | 3       |
| AD      | 0.315   |
| P value | 0.243   |

Fig 6F p-PI3K/PI3K

Maresin 1  
process report

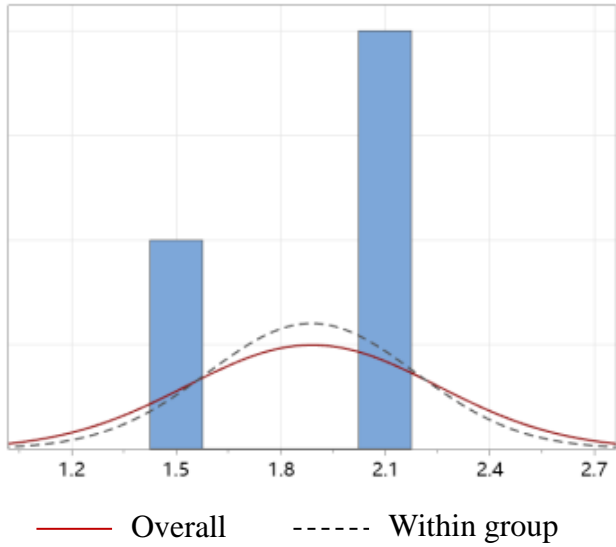

Maresin 1  
Normal distribution

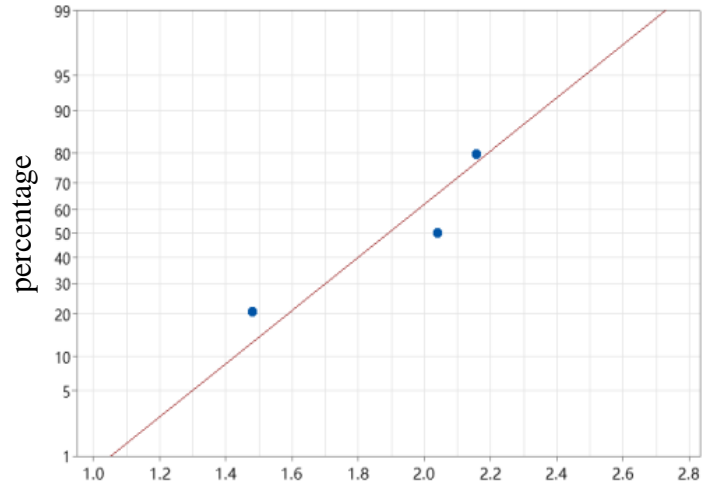

| Process data              |          |
|---------------------------|----------|
| Lower Specification Limit | 0        |
| Upper specification limit | 3        |
| Mean                      | 1.89037  |
| N                         | 3        |
| SD (Overall)              | 0.360439 |
| SD (Within group)         | 0.299126 |

|         |        |
|---------|--------|
| Mean    | 1.890  |
| SD      | 0.3604 |
| N       | 3      |
| AD      | 0.332  |
| P value | 0.211  |

Fig 6F p-PI3K/PI3K

NGF  
process report

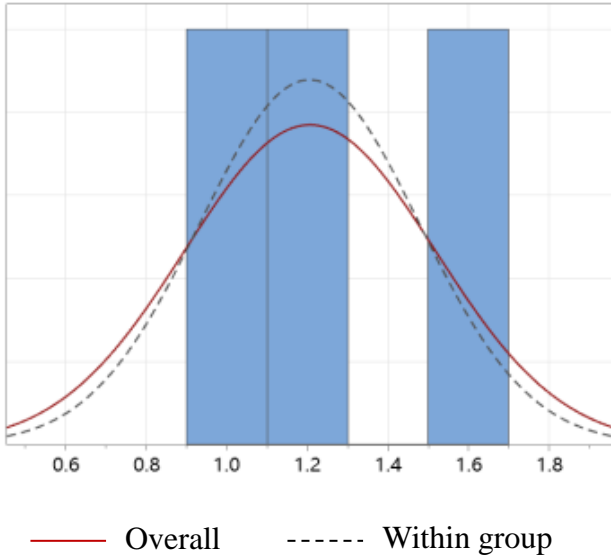

NGF  
Normal distribution

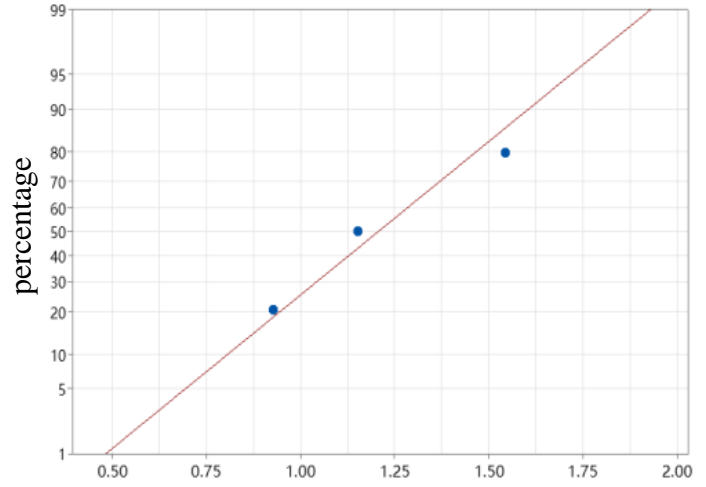

| Process data              |          |
|---------------------------|----------|
| Lower Specification Limit | 0        |
| Upper specification limit | 3        |
| Mean                      | 1.20649  |
| N                         | 3        |
| SD (Overall)              | 0.311057 |
| SD (Within group)         | 0.272438 |

|         |        |
|---------|--------|
| Mean    | 1.206  |
| SD      | 0.3111 |
| N       | 3      |
| AD      | 0.216  |
| P value | 0.524  |
